# Supplementary material for: Comparison of cognitive decline between dementia with Lewy bodies and Alzheimer's disease: a cohort study
Source: PubMed Central journal article supplement — BMJ Open. 2012 Feb 8;2(1):e000380. doi: 10.1136/bmjopen-2011-000380 (PMC3330257; doi:10.1136/bmjopen-2011-000380), 2012-02-08
Supplement: bmjopen-2011-000380-s2.pdf [file bmjopen-2011-000380-s2.pdf]

Please complete a relevant reporting checklist. More details are available in our Instructions for Authors  
- <http://bmjopen.bmj.com/site/about/guidelines.xhtml>
