# Supplementary material for: Comparison of cognitive decline between dementia with Lewy bodies and Alzheimer's disease: a cohort study
Source: PubMed Central journal article supplement — BMJ Open. 2012 Feb 8;2(1):e000380. doi: 10.1136/bmjopen-2011-000380 (PMC3330257; doi:10.1136/bmjopen-2011-000380), 2012-02-08
Supplement: bmjopen-2011-000380.draft_revisions.pdf [file bmjopen-2011-000380.draft_revisions.pdf]

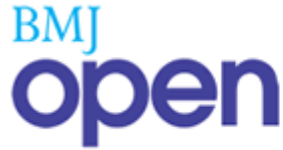

**No differences in symptom progression between dementia with Lewy bodies and Alzheimer's disease**

|                                  |                                                                                                                                                                                                                                                                                                                                                                                                                                                                                                                                                                                                                                                                                                                             |
|----------------------------------|-----------------------------------------------------------------------------------------------------------------------------------------------------------------------------------------------------------------------------------------------------------------------------------------------------------------------------------------------------------------------------------------------------------------------------------------------------------------------------------------------------------------------------------------------------------------------------------------------------------------------------------------------------------------------------------------------------------------------------|
| Journal:                         | <i>BMJ Open</i>                                                                                                                                                                                                                                                                                                                                                                                                                                                                                                                                                                                                                                                                                                             |
| Manuscript ID:                   | bmjopen-2011-000380                                                                                                                                                                                                                                                                                                                                                                                                                                                                                                                                                                                                                                                                                                         |
| Article Type:                    | Research                                                                                                                                                                                                                                                                                                                                                                                                                                                                                                                                                                                                                                                                                                                    |
| Date Submitted by the Author:    | 05-Oct-2011                                                                                                                                                                                                                                                                                                                                                                                                                                                                                                                                                                                                                                                                                                                 |
| Complete List of Authors:        | Walker, Zuzana; University College London, Mental Health Sciences<br>McKeith, Ian; Institute for Ageing and Health, Newcastle University<br>Rodda, Joanne; University College London, Research Department of Mental Health Sciences<br>Qassem, Tarik; North Essex Partnership Foundation NHS Trust, Mental Health Unit; Ain Shams University, Institute of Psychiatry<br>Tatsch, Klaus; Städtisches Klinikum Karlsruhe, Department of Nuclear Medicine<br>Booij, Jan; Academic Medical Centre, Department of Nuclear Medicine<br>Darcourt, Jacques; University of Nice Sophia-Antipolis, Centre Anoine<br>Lacassagne Department of Nuclear Medicine<br>O'Brien, John; Newcastle University, Institute for Ageing and Health |
| <b>Primary Subject Heading</b> : | Neurology                                                                                                                                                                                                                                                                                                                                                                                                                                                                                                                                                                                                                                                                                                                   |
| Secondary Subject Heading:       | Psychiatry                                                                                                                                                                                                                                                                                                                                                                                                                                                                                                                                                                                                                                                                                                                  |
| Keywords:                        | Cognitive disorders, ALZHEIMER'S DISEASE, LEWY BODY, Dementia < NEUROLOGY, SPECT, FUNCTIONAL IMAGING                                                                                                                                                                                                                                                                                                                                                                                                                                                                                                                                                                                                                        |
|                                  |                                                                                                                                                                                                                                                                                                                                                                                                                                                                                                                                                                                                                                                                                                                             |

SCHOLARONE™  
Manuscripts

1  
2  
3  
4  
5  
6  
7  
8  
9  
10  
11  
12  
13  
14  
15  
16  
17  
18  
19  
20  
21  
22  
23  
24  
25  
26  
27  
28  
29  
30  
31  
32  
33  
34  
35  
36  
37  
38  
39  
40  
41  
42  
43  
44  
45  
46  
47  
48  
49  
50  
51  
52  
53  
54  
55  
56  
57  
58  
59  
60

Please complete a relevant reporting checklist. More details are available in our Instructions for Authors  
- <http://bmjopen.bmj.com/site/about/guidelines.xhtml>

For peer review only

1  
2  
3  
4 **No differences in symptom progression between dementia with Lewy bodies and**  
5 **Alzheimer's disease: cohort study**  
6  
7  
8

9  
10 **Zuzana Walker MD**, Research Department of Mental Health Sciences, University College  
11 London, Bloomsbury Campus, London, UK and North Essex Partnership Foundation NHS  
12 Trust, Essex, UK  
13  
14

15  
16  
17 **Ian McKeith FMedSci** Institute for Ageing and Health, Newcastle University, Newcastle  
18 upon Tyne, UK  
19  
20

21  
22 **Joanne Rodda MBChB** Research Department of Mental Health Sciences, University  
23 College London, Bloomsbury Campus, London, UK  
24  
25

26  
27 **Tarik Gassem MBBCh** North Essex Partnership Foundation NHS Trust, Essex, UK and  
28 Institute of Psychiatry, Ain Shams University, Cairo, Egypt  
29  
30

31  
32 **Klaus Tatsch PhD** Department of Nuclear Medicine, Städtisches Klinikum Karlsruhe,  
33 Karlsruhe, Germany  
34  
35

36  
37 **Jan Booi PhD** Department of Nuclear Medicine, Academic Medical Centre, Amsterdam,  
38 Netherlands  
39  
40

41  
42 **Jacques Darcourt PhD** Centre Anoine Lacassagne Department of Nuclear Medicine,  
43 Medical Faculty, University of Nice Sophia-Antipolis, Nice, France  
44  
45

46  
47 **John O'Brien DM**, Institute for Ageing and Health, Newcastle University, Newcastle upon  
48 Tyne, UK  
49  
50

51  
52  
53 **Correspondence:** Zuzana Walker, Mental Health Unit, St. Margaret's Hospital, Epping,  
54 Essex, CM16 6TN, UK. email: [z.walker@ucl.ac.uk](mailto:z.walker@ucl.ac.uk)  
55  
56  
57  
58  
59  
60

### Contributions to the manuscript

Zuzana Walker: Involved in conception and design of the study as well as being a member of the consensus panel; contributed to statistical analysis and interpretation; co-wrote initial draft of the manuscript.

Ian McKeith: Involved in conception and design of the study as well as being a member of the consensus panel.

Joanne Rodda: Contributed to data analysis and interpretation; co-wrote initial draft of the manuscript; prepared final version of manuscript.

Tarik Qassem: Involved in data processing, analysis and interpretation.

Klaus Tatsch: Involved in conception and design of the study; performed the visual analysis of the SPECT data.

Jan Booij: Involved in conception and design of the study; performed the visual analysis of the SPECT data.

Jacques Darcourt: Involved in conception and design of the study; performed the visual analysis of the SPECT data.

John O'Brien: Involved in conception and design of the study as well as being a member of the consensus panel.

The final version was read and approved by all authors with JR and ZW incorporating the additional comments.

### Study funding and sponsorship:

The data collection was sponsored by GE Healthcare who made data available for further analysis for the present study.

**Author disclosure statements:**

At the time of the study Zuzana Walker, John O'Brien, Ian McKeith, Klaus Tatsch, Jan Booij and Jacques Darcourt have received consultancy payments from GE Healthcare. Joanne Rodda has received funding for neuroimaging research from GE Healthcare. Tarik Qassem has no disclosures.

For peer review only

## Abstract

**Background:** Dementia with Lewy bodies (DLB) accounts for 10-15% of dementia cases at autopsy and has distinct clinical features associated with earlier institutionalisation and a higher level of carer distress than are seen in Alzheimer's disease (AD). At present, there is ongoing debate as to whether DLB is associated with a more rapid cognitive decline than AD. An understanding of the rate of decline of cognitive and non-cognitive symptoms in DLB may help patients and carers to plan for the future.

**Methods:** We compared 100 AD and 58 DLB subjects at baseline and 12 month follow-up on cognitive and neuropsychiatric measures including the Cambridge Cognitive Examination and Neuropsychiatric Inventory (NPI). Subjects with mild-moderate dementia from 40 European centres were included. Diagnosis of DLB or AD required agreement between consensus panel clinical diagnosis and visual rating of  $^{123}\text{I}$ -FP-CIT (dopamine transporter) SPECT neuroimaging.

**Results:** The AD and DLB groups did not differ at baseline in terms of age, gender, Clinical Dementia Rating score and use of cholinesterase inhibitors or memantine. NPI and NPI carer distress scores were statistically significantly higher for DLB subjects at baseline and follow-up and there were no differences between AD and DLB in cognitive scores at baseline or follow-up. There was no significant difference in rate of progression of any of the variables analysed.

**Conclusions:** DLB subjects had more neuropsychiatric features at baseline and follow-up than AD, but we did not find any statistically significant difference in rate of progression between AD and DLB groups on cognitive or neuropsychiatric measures over a 12-month follow-up period.

## Article summary

### Article focus

- Dementia with Lewy bodies (DLB) has distinct neuropsychiatric features

- At present we do not know whether the poorer prognosis of DLB is due to a more rapid cognitive decline compared to Alzheimer's disease (AD)

### Key messages

- In this fairly large cohort of patients with DLB and AD, while there was no difference in level of cognitive impairment (CAMCOG score) at baseline and at 12 months follow-up, DLB patients had significantly higher NPI and NPI carer distress scores both at baseline and 12 months follow-up.
- Therefore the worse prognosis of DLB is likely to be mediated by neuropsychiatric or other symptoms and not by cognitive decline

### Strengths of this study

- Inclusion of high number of subjects from 40 European clinical centres
- Well characterised cases with both consensus panel clinical diagnosis (three clinical experts) and dopaminergic transporter SPECT imaging

### Limitations of the study

- No autopsy data were available and therefore it is possible that more rapid cognitive decline may be present in pure DLB
- Only one year of follow-up

## Introduction

Dementia with Lewy bodies (DLB) is the second most common form of neurodegenerative dementia and accounts for approximately 15% of cases of dementia at autopsy<sup>1</sup>. It is characterised by the central feature of a progressive dementia accompanied by one or more core features of fluctuations in cognition, visual hallucinations and spontaneous features of parkinsonism<sup>2</sup>.

Awareness of the rate of cognitive decline and also of non-cognitive symptoms can help carers and patients to adjust and plan appropriate lifestyle changes and to make arrangements for the future. This frequently involves making difficult decisions regarding treatment of psychiatric and motor symptoms and utilisation of limited resources available for patients with dementia.

Since its recognition as a neurodegenerative disorder, a body of research has focused on the differentiation of DLB from other dementias, in particular Alzheimer's disease (AD), in terms of both cross-sectional and longitudinal clinical factors. In addition to the clinical syndrome described in the consensus diagnostic criteria, DLB is associated with higher levels of behavioural disturbance and caregiver distress, lower quality of life and greater demand on resources when compared to AD<sup>3;4</sup>. Despite these findings, there is uncertainty within the literature regarding progression and survival in DLB compared to AD. Studies have shown survival in DLB to be either comparable to<sup>5</sup> or shorter<sup>6</sup> than in AD. No differences in decline on global measures (e.g. Clinical Dementia Rating, CDR) have been reported<sup>7</sup>. Studies of the progression of cognitive impairment have generally reported a similar<sup>7;8</sup> or steeper<sup>5</sup> rate of decline in DLB when compared to AD. An exception to this was a study by Stavitsky et al. where AD patients had a steeper decline on cognitive and behavioural measures, although DLB patients had been more impaired at baseline<sup>9</sup>.

Comparisons of longitudinal outcomes between DLB and AD to date have generally needed to trade off diagnostic accuracy against prospective study design. Autopsy studies have the benefit of definitive diagnosis, but are usually dependent on retrospective analysis of clinical data. Studies using clinical diagnosis often have the advantage of prospective study design but at the expense of diagnostic accuracy. Overall, the majority of studies of the 1996 clinical consensus criteria for DLB<sup>10</sup> have identified high specificity, with lower estimates of sensitivity. Whilst one study identified 83% sensitivity and 95% specificity, estimates of sensitivity from other studies have been as low as 23%<sup>11;12</sup> with reports of specificity ranging from 8-100%; the most frequent misdiagnosis of DLB is as AD<sup>13</sup>.



1  
2  
3  
4 The development of  $^{123}\text{I}$ -FP-CIT SPECT now allows visualisation of striatal dopamine  
5 transporters, and consequentially dopaminergic degeneration *in vivo*, and differentiates  
6 between AD and DLB with a sensitivity and specificity of 78-88% and 94-100% respectively  
7 <sup>14</sup>; an abnormal visual rating on  $^{123}\text{I}$ -FP-CIT SPECT was incorporated into the most recent  
8 revision of the consensus diagnostic criteria <sup>2</sup>. In the present study, our aim was to compare  
9 decline in cognitive, behavioural and global measures over a 12-month period in a  
10 prospectively followed cohort of subjects with either AD or DLB confirmed by consensus  
11 panel clinical diagnosis and normal (for AD) and abnormal (for DLB)  $^{123}\text{I}$ -FP-CIT SPECT  
12 imaging.  
13  
14  
15  
16  
17  
18  
19  
20  
21

## 22 **Methods**

23  
24 Data were collected as part of a phase 3 multicentre imaging study whose methodology is  
25 described in detail elsewhere <sup>15;16</sup>. In brief, patients were aged 55–90 years and met the  
26 criteria for dementia detailed in DSM-IV and fulfilled at least one of the following: consensus  
27 criteria for DLB <sup>10</sup> or NINCDS-ADRDA criteria for probable or possible AD <sup>17</sup>, or  
28 NINDS/AIREN criteria for probable or possible vascular dementia <sup>18</sup>. A Mini-Mental State  
29 Examination (MMSE) score at baseline of 10 or more was required to ensure patients could  
30 complete assessments <sup>19</sup>. Patients with dementia who developed parkinsonism more than 1  
31 year before the onset of dementia were deemed to have Parkinson's disease with dementia  
32 and were not included <sup>10</sup>. Those with structural imaging findings indicative of infarction in the  
33 region of the basal ganglia, including the internal capsule, were excluded. Use of medication  
34 known or suspected to interact with striatal binding of  $^{123}\text{I}$ -FP-CIT was not permitted <sup>20</sup>.  
35  
36  
37  
38  
39  
40  
41  
42  
43

44 The study was done in accordance with the current revision of the Declaration of Helsinki  
45 and the Good Clinical Practice: Consolidated Guideline approved by the International  
46 Conference on Harmonisation and applicable to national and local laws and regulations. At  
47 every participating site, the study protocol and all amendments were approved by an  
48 institutional review board or independent ethics committee. All patients and caregivers gave  
49 written informed consent.  
50  
51  
52  
53  
54  
55

56  
57 Following inclusion in the initial study, participants were invited for clinical and  
58 neuropsychological re-assessment at 12 months.  
59  
60

1  
2  
3  
4  
5  
6  
7  
8  
9  
10  
11  
12  
13  
14  
15  
16  
17  
18  
19  
20  
21  
22  
23  
24  
25  
26  
27  
28  
29  
30  
31  
32  
33  
34  
35  
36  
37  
38  
39  
40  
41  
42  
43  
44  
45  
46  
47  
48  
49  
50  
51  
52  
53  
54  
55  
56  
57  
58  
59  
60

Clinical diagnosis at baseline, as previously reported, was established by an independent consensus panel of three specialist clinicians, who were provided with a patient profile compiled from quality-assured clinical data from the on-site investigators' case record forms and copies of on-site original source data<sup>15</sup>. The same panel reconvened to consider the baseline and the 12-month follow-up data to arrive at a second and final consensus diagnosis. This final consensus diagnosis was used to derive the cohort for the present study.

The following were undertaken at baseline and follow-up: MMSE, Unified Parkinson's Disease Rating Scale (UPDRS) III (motor section)<sup>21</sup>, modified Hoehn and Yahr staging<sup>22</sup>, clinical assessment of cognitive fluctuation scale<sup>23</sup>, the Cambridge Cognitive Examination—revised version (CAMCOG-R)<sup>24</sup>, neuropsychiatric inventory with caregiver input (NPI-D)<sup>25</sup>, visual object and space perception (VOSP) battery<sup>26</sup> and clinical dementia rating (CDR)<sup>27</sup>. The Cornell Scale for Depression in Dementia<sup>28</sup> and the investigator's estimation of the patient's intelligence quotient level were completed at baseline, but not at follow-up. Results of MRI and CT scans and the on-site investigators' clinical diagnosis before imaging were also available. The consensus panel did not at any stage have access to <sup>123</sup>I-FP-CIT SPECT findings and was unaware of the patients' identities, and the names of the centre and the investigators. Before any cases were diagnosed, the consensus panel was asked to diagnose ten patients (separate to the study) for whom autopsy diagnosis was independently available. There was 100% concordance between the diagnoses made by the panel and at autopsy<sup>15</sup>. Individual panel members reviewed each study case, including the baseline consensus panel diagnosis and all subsequent information, before meeting to agree a final clinical diagnosis of probable DLB, possible DLB or non-DLB dementia. Patients in the non-DLB category were further allocated to probable or possible AD, probable or possible vascular dementia or other.

Within a few weeks of the baseline clinical diagnosis, SPECT images were acquired on a 2 or 3 headed gamma camera (SPECT system) 3–6 hours after a single intravenous injection of 111-185 MBq of <sup>123</sup>I-FP-CIT<sup>29</sup> (DaTSCAN™, the radiotracer was supplied by GE Healthcare). See McKeith *et al* for details<sup>15</sup>. Subjects underwent standard thyroid blocking. SPECT imaging was not repeated at follow-up. As previously described, three nuclear medicine physicians assessed scans, blind to diagnosis, using a 4 point scale (0 normal uptake; 1 unilateral putamen loss; 2 bilateral putamen loss; 3 virtually absent uptake)<sup>15</sup>, we used only the dichotomous division of normal (0) versus abnormal (1-3) images for analysis.

1  
2  
3  
4  
5 For the present study, we combined the three independent reads and recorded the result of  
6 the scan as normal or abnormal if there was agreement between two or more raters.  
7  
8  
9

10 For the purposes of the present study, we included only patients with complete data sets  
11 from both baseline (T1) and 1 year follow up (T2) assessments and with reliable images  
12 from the baseline  $^{123}\text{I}$ -FP-CIT SPECT session (n=225). These patients were divided into two  
13 diagnostic groups (AD and DLB). Inclusion criteria for the AD group were a consensus  
14 diagnosis of possible or probable AD at 12 months follow-up in addition to a negative  
15 (normal)  $^{123}\text{I}$ -FP-CIT SPECT read (n=100). To be included in the DLB group, patients were  
16 required to have a consensus diagnosis of probable DLB at 12 months follow up and to have  
17 a positive (abnormal)  $^{123}\text{I}$ -FP-CIT SPECT image read (n=58). Patients with a dementia  
18 diagnosis other than possible or probable AD or probable DLB were excluded (n=50).  
19 Patients with a  $^{123}\text{I}$ -FP-CIT SPECT image read that was not in keeping with the consensus  
20 clinical diagnosis at 12 months were also excluded (n=14 probable DLB, 3 AD).  
21  
22  
23  
24  
25  
26  
27  
28  
29  
30

### 31 **Statistical analysis**

32  
33 Data were analysed using SPSS version 18. We compared baseline and 12-month follow-up  
34 data and change over time for the AD and DLB groups.  $\chi^2$  tests were used to assess  
35 differences between the diagnostic groups (AD and DLB) with respect to gender and  
36 medication use at baseline. For normally distributed variables, t-tests were used for  
37 between-group comparisons of baseline and follow-up variables. Mann Whitney U-tests  
38 were used for non-normally distributed baseline and follow-up data. Repeated measures  
39 ANOVA was used for analysis of group x time interactions (comparison of change in  
40 variables over time in each group). General Linear Models with fixed effect were used to  
41 adjust for the difference in NPI scores and the scores on the Cornell Scale for Depression in  
42 Dementia at baseline  
43  
44  
45  
46  
47  
48  
49  
50  
51  
52  
53  
54  
55  
56  
57  
58  
59  
60

## Results

|                                                          |           | AD<br>(n=100) | DLB<br>(n=58) | P      |
|----------------------------------------------------------|-----------|---------------|---------------|--------|
| Gender (M:F)                                             | M         | 48 [48%]      | 37 [64%]      | 0.06   |
|                                                          | F         | 52 [52%]      | 21 [36%]      |        |
| Age in years at <sup>123</sup> I-FP-CIT<br>SPECT session |           | 74.9 (7.3)    | 74.2 (6.1)    | 0.53   |
| Cornell Scale for Depression in<br>Dementia              |           | 3.8 (3.3)     | 6.6 (3.4)     | <0.001 |
| Cholinesterase inhibitor                                 |           | 82 [82%]      | 45 [76%]      | 0.50   |
| Memantine                                                |           | 9 [9%]        | 2 [3%]        | 0.19   |
| Neuroleptic medication                                   |           | 4 [4%]        | 9 [16%]       | 0.01   |
| Clinical Dementia Rating                                 |           | 1.2 (0.69)    | 1.3 (0.66)    | 0.3    |
| MMSE<br>score (SD)                                       | Baseline  | 21.5 (4.5)    | 21.4 (3.9)    | 0.85   |
|                                                          | Follow-up | 19.0 (6.2)    | 18.5 (6.0)    | 0.65   |
|                                                          | Change    | 2.6 (4.0)     | 3.1 (4.3)     | 0.40   |
| CAMCOG<br>score (SD)                                     | Baseline  | 66.3 (15.6)   | 66.0 (13.5)   | 0.89   |
|                                                          | Follow-up | 59.5 (20.3)   | 56.3 (19.7)   | 0.35   |
|                                                          | Change    | 7.5 (10.6)    | 9.0 (11.9)    | 0.429  |
| NPI score<br>(SD)                                        | Baseline  | 9.7 (10.3)    | 19.8 (14.6)   | <0.001 |
|                                                          | Follow-up | 12.3 (13.3)   | 24.2 (17.4)   | <0.001 |
|                                                          | Change    | 2.5 (14.8)    | 3.8 (15.5)    | 0.59   |
| NPI-carer<br>score (SD)                                  | Baseline  | 5.8 (6.0)     | 10.8 (8.0)    | <0.001 |
|                                                          | Follow-up | 5.8 (5.7)     | 11.8 (8.6)    | <0.001 |
|                                                          | Change    | -0.05 (6.4)   | 0.8 (7.1)     | 0.44   |
| Fluctuations                                             | Baseline  | 0.6 (2.1)     | 6.0 (4.5)     | <0.001 |
|                                                          | Follow up | 0.4 (1.7)     | 6.9 (4.1)     | <0.001 |
|                                                          | Change    | -0.2 (2.4)    | 0.8 (4.1)     | 0.07   |
| CAMCOG<br>Executive<br>function                          | Baseline  | 11.9 (5.2)    | 11.1 (4.7)    | 0.33   |
|                                                          | Follow-up | 10.5 (5.4)    | 9.4 (5.0)     | 0.24   |
|                                                          | Change    | 1.5 (3.6)     | 1.4 (4.0)     | 0.83   |

1  
2  
3  
4 Table: Baseline characteristics and scores on clinical scales and cognitive testing at baseline  
5 and 12 month follow-up and change in scores between time points for AD and DLB groups.  
6 Data are presented as mean (SD) or number (%).  
7  
8  
9

10  
11  
12 Baseline and follow-up data for the DLB and AD groups are presented in the table. The  
13 groups did not differ in terms of age or gender. There were no between-group baseline  
14 differences in terms of CDR or use of cholinesterase inhibitors or memantine. The DLB  
15 group had a statistically significant higher mean depression score at baseline and higher  
16 scores on the NPI, NPI carer distress and clinical assessment of cognitive fluctuation scales  
17 at both baseline and 12-month follow-up ( $p < 0.001$ ). There were no differences between the  
18 groups on cognitive scores at either baseline or follow-up. No significant differences in  
19 change in scores between baseline and 12-month follow-up for any of the variables analysed  
20 were identified. Results of analysis did not change when data were stratified according to  
21 gender. There was also no statistically significant difference between DLB and AD in the  
22 change of CAMCOG score after adjustment for scores on NPI and Cornell Scale for  
23 Depression scores. There were numerically greater changes between baseline and follow-up  
24 on cognition, fluctuation and on measures of neuropsychiatric symptoms in the DLB patients  
25 but this did not reach statistical significance. The lack of a significant difference on the  
26 cognitive performance between the DLB and AD groups is unlikely to be due to type II error,  
27 as the effect size of that difference was very small (0.02-0.07).  
28  
29  
30  
31  
32  
33  
34  
35  
36  
37  
38  
39  
40

## 41 Discussion

42  
43 In a prospectively-followed sample of patients with clinical consensus panel and dopamine  
44 transporter SPECT confirmed diagnosis of AD or DLB, cross-sectional assessments  
45 identified expected between-group similarities and differences in cognitive scores and  
46 clinical scales in addition to a higher level of carer distress in the DLB group. We identified  
47 no differences in rate of progression of cognitive or neuropsychiatric variables over a 12-  
48 month follow-up period. Our inclusion of only patients whose consensus clinical diagnosis  
49 was in keeping with neuroimaging results make it likely that diagnostic accuracy was very  
50 high. Our sample was drawn from 40 different centres in 10 European countries and is thus  
51 representative of the clinical population in Europe rather than a single academic centre.  
52  
53  
54  
55  
56  
57  
58  
59  
60

AD and DLB groups were well-matched in terms of age and degree of cognitive impairment  
at baseline. The findings of higher scores on the NPI, clinician assessment of fluctuation and

1  
2  
3  
4  
5  
6  
7  
8  
9  
10  
11  
12  
13  
14  
15  
16  
17  
18  
19  
20  
21  
22  
23  
24  
25  
26  
27  
28  
29  
30  
31  
32  
33  
34  
35  
36  
37  
38  
39  
40  
41  
42  
43  
44  
45  
46  
47  
48  
49  
50  
51  
52  
53  
54  
55  
56  
57  
58  
59  
60

Cornell Scale for Depression in dementia were expected given the recognised criteria for diagnosis of DLB <sup>2</sup>.

NPI score was higher at both timepoints in DLB, despite similar cognitive and baseline CDR scores; this was associated with higher levels of caregiver distress and is in keeping with other published data <sup>4;30</sup>. Severity of neuropsychiatric symptoms in AD <sup>31</sup> and DLB <sup>32</sup> has been shown to be a predictor of both caregiver distress and nursing home placement. Caregiver distress has also been shown to be an independent risk factor for nursing home placement in dementia <sup>33</sup>. It is possible that the shorter time to nursing home placement that has been reported in DLB compared to AD <sup>34</sup> is related to neuropsychiatric symptoms and associated caregiver distress. Not all studies are consistent, however, and marginal <sup>6</sup> or no differences <sup>8</sup> in time to placement have also been reported. Furthermore, costs of care in DLB and AD have been shown to correlate with impairments in activities of daily living and not NPI scores <sup>4</sup>.

Severity of neuropsychiatric symptomatology, and hallucinations in particular, has also been associated with steeper decline in cognitive scores and increased risk of mortality and institutionalisation in AD, independent of antipsychotic drug use <sup>35;36</sup>. These studies have lacked autopsy confirmation of diagnosis and it is possible that AD groups included individuals with undiagnosed DLB, who are more likely to experience hallucinations. We are not aware of any published data related to the impact of neuropsychiatric symptom severity on illness progression and survival in DLB.

We did not identify any between-group differences in change over time of any of the variables examined, i.e. NPI, fluctuations and cognitive performance. It is possible that the lack of detectable difference in decline of NPI and fluctuation scores over time is related to the already high scores at baseline in DLB. The majority of studies of the rate of cognitive decline in DLB vs AD have also reported no differences, e.g. <sup>7;8</sup>, although the earliest reports were of more rapid decline in cognition in DLB <sup>37</sup>, as were more recent studies <sup>5</sup>. Several studies have reported relatively preserved cognitive scores, particularly in recall, before death in DLB compared to AD <sup>5</sup>.

1  
2  
3  
4  
5  
6  
7  
8  
9  
10  
11  
12  
13  
14  
15  
16  
17  
18  
19  
20  
21  
22  
23  
24  
25  
26  
27  
28  
29  
30  
31  
32  
33  
34  
35  
36  
37  
38  
39  
40  
41  
42  
43  
44  
45  
46  
47  
48  
49  
50  
51  
52  
53  
54  
55  
56  
57  
58  
59  
60

It has been suggested that DLB may be associated with a more rapid decline in global measures of dementia severity or measures of activities of daily living whilst cognitive performance is relatively preserved. However, no significant differences in change in CDR score over time between DLB and AD groups have yet been identified<sup>7</sup>. We did not examine performance on activities of daily living. Cross-sectional assessments of activities of living have reported higher levels of impairment in DLB than AD<sup>9,30</sup>, which may be related to extrapyramidal motor symptoms<sup>38</sup>. Longitudinal data, however, suggest no difference or a marginal difference in rate of decline of activities of daily living between AD and DLB<sup>9</sup>.

Whilst ours and the majority of studies do not support the idea of a more rapid decline in cognition in DLB, the available literature is split more evenly between findings of either similar or shorter survival in DLB compared to AD. One possibility is that reports of worse outcomes in DLB are related to increased frequency of antipsychotic use as a result of greater severity of neuropsychiatric symptoms. Whilst more DLB than AD participants were prescribed neuroleptics in the present study, no differences in rate of progression were identified. Previous studies of cognitive decline in AD and DLB that have presented data on neuroleptic prescribing did not report any differences between the groups in use of these medications<sup>8,39</sup>. In terms of survival, both early<sup>40</sup> and more recent<sup>6,8</sup> studies have reported shorter survival in DLB vs AD, despite likely changes in neuroleptic prescribing over this time as a result of better understanding of the potentially harmful effects in both DLB<sup>2,10</sup> and dementia as a whole. It therefore seems unlikely that reported differences in survival between DLB and AD can be entirely accounted for by antipsychotic use.

The literature surrounding the differences in longitudinal outcomes in DLB and AD is therefore not easy to interpret. Overall, studies report outcomes in DLB that are either no different from or worse than in AD. Some of the difficulties involved in interpreting and comparing these findings are the differences in study design, use of clinical rather than pathological diagnosis, differing pathological definitions, and retrospective analysis of clinical data. In addition, studies often rely on relative's reports on the onset of dementia, or use as baseline the time of referral, diagnosis or entry into the study. None of these methods necessarily identify equivalent disease stages and these difficulties highlight the complexity of the task of comparing the rate of decline between two disorders with different clinical phenotypes. In DLB, episodic memory is relatively spared in the early stages, but the presence of attentional and visuospatial impairments, visual hallucinations or movement disorder might be more disabling. Comparisons between AD and DLB are therefore not



1  
2  
3  
4 straightforward, and it is hard to define what is an “equivalent” disease stage. The picture is  
5 further complicated by the frequent overlap of AD and DLB neuropathology and the insidious  
6 onset of both of these conditions.  
7  
8  
9

10  
11 Our study would have been improved by a longer duration of follow-up and a more detailed  
12 breakdown of cognitive and clinical measures. Exclusion of individuals with severe dementia  
13 precluded detection of differences in progression that are present only in later disease  
14 stages. Without autopsy diagnosis, we were not able to differentiate patients with pure and  
15 combined pathology.  
16  
17  
18  
19  
20

21  
22 In conclusion, on global cognitive measures, we did not find any difference in rate of  
23 progression between AD and DLB groups over a one-year period of observation. Cognitive  
24 decline is only one aspect of dementia and other impairments may in fact be more important  
25 and disabling.  
26  
27  
28  
29  
30  
31  
32  
33  
34  
35  
36  
37  
38  
39  
40  
41  
42  
43  
44  
45  
46  
47  
48  
49  
50  
51  
52  
53  
54  
55  
56  
57  
58  
59  
60



## Reference List

1. Holmes C, Cairns N, Lantos P et al. Validity of current clinical criteria for Alzheimer's disease, vascular dementia and dementia with Lewy bodies. *Br.J.Psychiatry* 1999;**174**:45-50.
2. McKeith IG, Dickson DW, Lowe J et al. Diagnosis and management of dementia with Lewy bodies: third report of the DLB Consortium. *Neurology* 2005;**65**:1863-72.
3. Bostrom F, Jonsson L, Minthon L et al. Patients with dementia with lewy bodies have more impaired quality of life than patients with Alzheimer disease. *Alzheimer Dis.Assoc.Disord.* 2007;**21**:150-4.
4. Bostrom F, Jonsson L, Minthon L et al. Patients with Lewy body dementia use more resources than those with Alzheimer's disease. *Int.J.Geriatr.Psychiatry* 2007;**22**:713-9.
5. Nelson PT, Kryscio RJ, Jicha GA et al. Relative preservation of MMSE scores in autopsy-proven dementia with Lewy bodies. *Neurology* 2009;**73**:1127-33.
6. Williams MM, Xiong C, Morris JC et al. Survival and mortality differences between dementia with Lewy bodies vs Alzheimer disease. *Neurology* 2006;**67**:1935-41.
7. Johnson DK, Morris JC, Galvin JE. Verbal and visuospatial deficits in dementia with Lewy bodies. *Neurology* 2005;**65**:1232-8.
8. Hanyu H, Sato T, Hirao K et al. Differences in clinical course between dementia with Lewy bodies and Alzheimer's disease. *Eur.J.Neurol.* 2009;**16**:212-7.
9. Stavitsky K, Brickman AM, Scarmeas N et al. The progression of cognition, psychiatric symptoms, and functional abilities in dementia with Lewy bodies and Alzheimer disease. *Arch.Neurol.* 2006;**63**:1450-6.

10. McKeith IG, Galasko D, Kosaka K et al. Consensus guidelines for the clinical and pathologic diagnosis of dementia with Lewy bodies (DLB): report of the consortium on DLB international workshop. *Neurology* 1996;**47**:1113-24.
11. Lopez OL, Becker JT, Kaufer DI et al. Research evaluation and prospective diagnosis of dementia with Lewy bodies. *Arch.Neurol* 2002;**59**:43-6.
12. O'Brien JT, Colloby S, Fenwick J et al. Dopamine transporter loss visualized with FP-CIT SPECT in the differential diagnosis of dementia with Lewy bodies. *Arch.Neurol.* 2004;**61**:919-25.
13. Barker WW, Luis CA, Kashuba A et al. Relative frequencies of Alzheimer disease, Lewy body, vascular and frontotemporal dementia, and hippocampal sclerosis in the State of Florida Brain Bank. *Alzheimer Dis.Assoc.Disord.* 2002;**16**:203-12.
14. Walker Z, Jaros E, Walker RW et al. Dementia with lewy bodies: A comparison of clinical diagnosis, FP-CIT SPECT imaging and autopsy. *J.Neurol.Neurosurg.Psychiatry* 2007.
15. McKeith I, O'Brien JT, Walker Z et al. Sensitivity and specificity of dopamine transporter imaging with 123I-FP-CIT SPECT in dementia with Lewy bodies: a phase III, multicentre study. *Lancet Neurol.* 2007;**6**:305-13.
16. O'Brien JT, McKeith IG, Walker Z et al. Diagnostic accuracy of 123I-FP-CIT SPECT in possible dementia with Lewy bodies. *Br.J.Psychiatry* 2009;**194**:34-9.
17. McKhann G, Drachman D, Folstein M et al. Clinical diagnosis of Alzheimer's disease: report of the NINCDS-ADRDA Work Group under the auspices of Department of Health and Human Services Task Force on Alzheimer's Disease. *Neurology* 1984;**34**:939-44.

- 1  
2  
3  
4  
5  
6  
7  
8  
9  
10  
11  
12  
13  
14  
15  
16  
17  
18  
19  
20  
21  
22  
23  
24  
25  
26  
27  
28  
29  
30  
31  
32  
33  
34  
35  
36  
37  
38  
39  
40  
41  
42  
43  
44  
45  
46  
47  
48  
49  
50  
51  
52  
53  
54  
55  
56  
57  
58  
59  
60
18. Roman GC, Tatemichi TK, Erkinjuntti T et al. Vascular dementia: diagnostic criteria for research studies. Report of the NINDS-AIREN International Workshop. *Neurology* 1993;**43**:250-60.
  19. Folstein MF, Folstein SE, McHugh PR. "Mini-mental state". A practical method for grading the cognitive state of patients for the clinician. *J.Psychiatr.Res.* 1975;**12**:189-98.
  20. Booij J, Kemp P. Dopamine transporter imaging with [(123)I]FP-CIT SPECT: potential effects of drugs. *Eur.J.Nucl.Med.Mol.Imaging* 2008;**35**:424-38.
  21. Fahn S, Elton RL. Unified Parkinson's Disease Rating Scale. In: Fahn S, Marsden DC, Goldstein M, Calne DB, eds. *Recent Developments in Parkinson's Disease*. McMillan 1987.
  22. Hoehn MM, Yahr MD. Parkinsonism: onset, progression, and mortality. 1967. *Neurology* 1998;**50**:318.
  23. Walker MP, Ayre GA, Cummings JL et al. The Clinician Assessment of Fluctuation and the One Day Fluctuation Assessment Scale. Two methods to assess fluctuating confusion in dementia. *Br.J.Psychiatry* 2000;**177**:252-6.
  24. Huppert FA, Brayne C, Gill C et al. CAMCOG--a concise neuropsychological test to assist dementia diagnosis: socio-demographic determinants in an elderly population sample. *Br.J.Clin.Psychol.* 1995;**34 ( Pt 4)**:529-41.
  25. Cummings JL, Mega M, Gray K et al. The Neuropsychiatric Inventory: comprehensive assessment of psychopathology in dementia. *Neurology* 1994;**44**:2308-14.
  26. Warrington EK, James M. A new test of object decision: 2D silhouettes featuring a minimal view. *Cortex* 1991;**27**:370-83.

- 1  
2  
3  
4  
5  
6  
7  
8  
9  
10  
11  
12  
13  
14  
15  
16  
17  
18  
19  
20  
21  
22  
23  
24  
25  
26  
27  
28  
29  
30  
31  
32  
33  
34  
35  
36  
37  
38  
39  
40  
41  
42  
43  
44  
45  
46  
47  
48  
49  
50  
51  
52  
53  
54  
55  
56  
57  
58  
59  
60
27. Hughes CP, Berg L, Danziger WL et al. A new clinical scale for the staging of dementia. *Br.J.Psychiatry* 1982;**140**:566-72.
28. Alexopoulos GS, Abrams RC, Young RC et al. Cornell Scale for Depression in Dementia. *Biol.Psychiatry* 1988;**23**:271-84.
29. Booij J, Hemelaar TG, Speelman JD et al. One-day protocol for imaging of the nigrostriatal dopaminergic pathway in Parkinson's disease by [123I]FPCIT SPECT. *J.Nucl.Med.* 1999;**40**:753-61.
30. Ricci M, Guidoni SV, Sepe-Monti M et al. Clinical findings, functional abilities and caregiver distress in the early stage of dementia with Lewy bodies (DLB) and Alzheimer's disease (AD). *Arch.Gerontol.Geriatr.* 2009;**49**:e101-e104.
31. Rocca P, Leotta D, Liffredo C et al. Neuropsychiatric Symptoms Underlying Caregiver Stress and Insight in Alzheimer's Disease. *Dement.Geriatr.Cogn Disord.* 2010;**30**:57-63.
32. Leggett AN, Zarit S, Taylor A et al. Stress and Burden Among Caregivers of Patients with Lewy Body Dementia. *Gerontologist* 2010.
33. Gaugler JE, Yu F, Krichbaum K et al. Predictors of nursing home admission for persons with dementia. *Med.Care* 2009;**47**:191-8.
34. Rongve, A, Skogseth, R, and Aarsland, D. Risk of nursing home placement in dementia with Lewy bodies and Alzheimer's dementia. *Alzheimer's and Dementia* 5(4 Supplement), 79. 2010.
- Ref Type: Abstract
35. Wilson RS, Tang Y, Aggarwal NT et al. Hallucinations, cognitive decline, and death in Alzheimer's disease. *Neuroepidemiology* 2006;**26**:68-75.

- 1  
2  
3  
4  
5  
6  
7  
8  
9  
10  
11  
12  
13  
14  
15  
16  
17  
18  
19  
20  
21  
22  
23  
24  
25  
26  
27  
28  
29  
30  
31  
32  
33  
34  
35  
36  
37  
38  
39  
40  
41  
42  
43  
44  
45  
46  
47  
48  
49  
50  
51  
52  
53  
54  
55  
56  
57  
58  
59  
60
36. Scarmeas N, Brandt J, Albert M et al. Delusions and hallucinations are associated with worse outcome in Alzheimer disease. *Arch.Neurol.* 2005;**62**:1601-8.
37. Olichney JM, Galasko D, Salmon DP et al. Cognitive decline is faster in Lewy body variant than in Alzheimer's disease. *Neurology* 1998;**51**:351-7.
38. McKeith IG, Rowan E, Askew K et al. More severe functional impairment in dementia with lewy bodies than Alzheimer disease is related to extrapyramidal motor dysfunction. *Am.J.Geriatr.Psychiatry* 2006;**14**:582-8.
39. Weiner MF, Risser RC, Cullum CM et al. Alzheimer's disease and its Lewy body variant: a clinical analysis of postmortem verified cases. *Am.J.Psychiatry* 1996;**153**:1269-73.
40. Ballard C, Holmes C, McKeith I et al. Psychiatric morbidity in dementia with Lewy bodies: a prospective clinical and neuropathological comparative study with Alzheimer's disease. *Am.J.Psychiatry* 1999;**156**:1039-45.

STROBE 2007 (v4) Statement—Checklist of items that should be included in reports of *cohort studies*

| Section/Topic                | Item # | Recommendation                                                                                                                                                                       | Reported on page # |
|------------------------------|--------|--------------------------------------------------------------------------------------------------------------------------------------------------------------------------------------|--------------------|
| Title and abstract           | 1      | (a) Indicate the study's design with a commonly used term in the title or the abstract                                                                                               | 1                  |
|                              |        | (b) Provide in the abstract an informative and balanced summary of what was done and what was found                                                                                  | 4                  |
| <b>Introduction</b>          |        |                                                                                                                                                                                      |                    |
| Background/rationale         | 2      | Explain the scientific background and rationale for the investigation being reported                                                                                                 | 6                  |
| Objectives                   | 3      | State specific objectives, including any prespecified hypotheses                                                                                                                     | 7                  |
| <b>Methods</b>               |        |                                                                                                                                                                                      |                    |
| Study design                 | 4      | Present key elements of study design early in the paper                                                                                                                              | 7                  |
| Setting                      | 5      | Describe the setting, locations, and relevant dates, including periods of recruitment, exposure, follow-up, and data collection                                                      | 7                  |
| Participants                 | 6      | (a) Give the eligibility criteria, and the sources and methods of selection of participants. Describe methods of follow-up                                                           | 9                  |
|                              |        | (b) For matched studies, give matching criteria and number of exposed and unexposed                                                                                                  |                    |
| Variables                    | 7      | Clearly define all outcomes, exposures, predictors, potential confounders, and effect modifiers. Give diagnostic criteria, if applicable                                             | 8                  |
| Data sources/<br>measurement | 8*     | For each variable of interest, give sources of data and details of methods of assessment (measurement). Describe comparability of assessment methods if there is more than one group | 8                  |
| Bias                         | 9      | Describe any efforts to address potential sources of bias                                                                                                                            | 9                  |
| Study size                   | 10     | Explain how the study size was arrived at                                                                                                                                            | 9                  |
| Quantitative variables       | 11     | Explain how quantitative variables were handled in the analyses. If applicable, describe which groupings were chosen and why                                                         | 9                  |
| Statistical methods          | 12     | (a) Describe all statistical methods, including those used to control for confounding                                                                                                | 9                  |
|                              |        | (b) Describe any methods used to examine subgroups and interactions                                                                                                                  | 9                  |
|                              |        | (c) Explain how missing data were addressed                                                                                                                                          | 9                  |
|                              |        | (d) If applicable, explain how loss to follow-up was addressed                                                                                                                       | 9                  |
|                              |        | (e) Describe any sensitivity analyses                                                                                                                                                | 9                  |
| <b>Results</b>               |        |                                                                                                                                                                                      |                    |

|                          |     |                                                                                                                                                                                                              |     |
|--------------------------|-----|--------------------------------------------------------------------------------------------------------------------------------------------------------------------------------------------------------------|-----|
| Participants             | 13* | (a) Report numbers of individuals at each stage of study—eg numbers potentially eligible, examined for eligibility, confirmed eligible, included in the study, completing follow-up, and analysed            | 11  |
|                          |     | (b) Give reasons for non-participation at each stage                                                                                                                                                         | 9   |
|                          |     | (c) Consider use of a flow diagram                                                                                                                                                                           | n/a |
| Descriptive data         | 14* | (a) Give characteristics of study participants (eg demographic, clinical, social) and information on exposures and potential confounders                                                                     | 10  |
|                          |     | (b) Indicate number of participants with missing data for each variable of interest                                                                                                                          | n/a |
|                          |     | (c) Summarise follow-up time (eg, average and total amount)                                                                                                                                                  | 7   |
| Outcome data             | 15* | Report numbers of outcome events or summary measures over time                                                                                                                                               | 9   |
| Main results             | 16  | (a) Give unadjusted estimates and, if applicable, confounder-adjusted estimates and their precision (eg, 95% confidence interval). Make clear which confounders were adjusted for and why they were included | n/a |
|                          |     | (b) Report category boundaries when continuous variables were categorized                                                                                                                                    | n/a |
|                          |     | (c) If relevant, consider translating estimates of relative risk into absolute risk for a meaningful time period                                                                                             | n/a |
| Other analyses           | 17  | Report other analyses done—eg analyses of subgroups and interactions, and sensitivity analyses                                                                                                               | n/a |
| <b>Discussion</b>        |     |                                                                                                                                                                                                              |     |
| Key results              | 18  | Summarise key results with reference to study objectives                                                                                                                                                     | 11  |
| <b>Limitations</b>       |     |                                                                                                                                                                                                              |     |
| Interpretation           | 20  | Give a cautious overall interpretation of results considering objectives, limitations, multiplicity of analyses, results from similar studies, and other relevant evidence                                   | 14  |
| Generalisability         | 21  | Discuss the generalisability (external validity) of the study results                                                                                                                                        | 13  |
| <b>Other information</b> |     |                                                                                                                                                                                                              |     |
| Funding                  | 22  | Give the source of funding and the role of the funders for the present study and, if applicable, for the original study on which the present article is based                                                | 2   |

\*Give information separately for cases and controls in case-control studies and, if applicable, for exposed and unexposed groups in cohort and cross-sectional studies.

**Note:** An Explanation and Elaboration article discusses each checklist item and gives methodological background and published examples of transparent reporting. The STROBE checklist is best used in conjunction with this article (freely available on the Web sites of PLoS Medicine at <http://www.plosmedicine.org/>, Annals of Internal Medicine at <http://www.annals.org/>, and Epidemiology at <http://www.epidem.com/>). Information on the STROBE Initiative is available at [www.strobe-statement.org](http://www.strobe-statement.org).

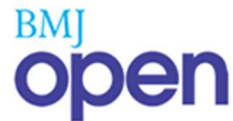

**Comparison of cognitive decline between dementia with Lewy bodies and Alzheimer's disease: a cohort study**

|                                 |                                                                                                                                                                                                                                                                                                                                                                                                                                                                                                                                                                                                                                                                                                                             |
|---------------------------------|-----------------------------------------------------------------------------------------------------------------------------------------------------------------------------------------------------------------------------------------------------------------------------------------------------------------------------------------------------------------------------------------------------------------------------------------------------------------------------------------------------------------------------------------------------------------------------------------------------------------------------------------------------------------------------------------------------------------------------|
| Journal:                        | <i>BMJ Open</i>                                                                                                                                                                                                                                                                                                                                                                                                                                                                                                                                                                                                                                                                                                             |
| Manuscript ID:                  | bmjopen-2011-000380.R1                                                                                                                                                                                                                                                                                                                                                                                                                                                                                                                                                                                                                                                                                                      |
| Article Type:                   | Research                                                                                                                                                                                                                                                                                                                                                                                                                                                                                                                                                                                                                                                                                                                    |
| Date Submitted by the Author:   | 28-Nov-2011                                                                                                                                                                                                                                                                                                                                                                                                                                                                                                                                                                                                                                                                                                                 |
| Complete List of Authors:       | Walker, Zuzana; University College London, Mental Health Sciences<br>McKeith, Ian; Institute for Ageing and Health, Newcastle University<br>Rodda, Joanne; University College London, Research Department of Mental Health Sciences<br>Qassem, Tarik; North Essex Partnership Foundation NHS Trust, Mental Health Unit; Ain Shams University, Institute of Psychiatry<br>Tatsch, Klaus; Städtisches Klinikum Karlsruhe, Department of Nuclear Medicine<br>Booij, Jan; Academic Medical Centre, Department of Nuclear Medicine<br>Darcourt, Jacques; University of Nice Sophia-Antipolis, Centre Anoine<br>Lacassagne Department of Nuclear Medicine<br>O'Brien, John; Newcastle University, Institute for Ageing and Health |
| <b>Primary Subject Heading</b>: | Neurology                                                                                                                                                                                                                                                                                                                                                                                                                                                                                                                                                                                                                                                                                                                   |
| Secondary Subject Heading:      | Mental health                                                                                                                                                                                                                                                                                                                                                                                                                                                                                                                                                                                                                                                                                                               |
| Keywords:                       | Cognitive disorders, ALZHEIMER'S DISEASE, LEWY BODY, Dementia < NEUROLOGY, SPECT, FUNCTIONAL IMAGING                                                                                                                                                                                                                                                                                                                                                                                                                                                                                                                                                                                                                        |
|                                 |                                                                                                                                                                                                                                                                                                                                                                                                                                                                                                                                                                                                                                                                                                                             |

SCHOLARONE™  
Manuscripts



1  
2  
3  
4 **No differences in Comparison of -symptom progression cognitive decline between**  
5 **dementia with Lewy bodies and Alzheimer's disease: a cohort study**  
6  
7  
8  
9

10 **Zuzana Walker MD**, Research Department of Mental Health Sciences, University College  
11 London, Bloomsbury Campus, London, UK and North Essex Partnership Foundation NHS  
12 Trust, Essex, UK  
13

14 **Ian McKeith FMedSci** Institute for Ageing and Health, Newcastle University, Newcastle  
15 upon Tyne, UK  
16  
17

18 **Joanne Rodda MBChB** Research Department of Mental Health Sciences, University  
19 College London, Bloomsbury Campus, London, UK  
20  
21

22 **Tarik Qassem MBBCh** North Essex Partnership Foundation NHS Trust, Essex, UK and  
23 Institute of Psychiatry, Ain Shams University, Cairo, Egypt  
24  
25

26 **Klaus Tatsch PhD** Department of Nuclear Medicine, Städtisches Klinikum Karlsruhe,  
27 Karlsruhe, Germany  
28  
29

30 **Jan Booij PhD** Department of Nuclear Medicine, Academic Medical Centre, Amsterdam,  
31 Netherlands  
32

33 **Jacques Darcourt PhD** Centre Anoine Lacassagne Department of Nuclear Medicine,  
34 Medical Faculty, University of Nice Sophia-Antipolis, Nice, France  
35  
36

37 **John O'Brien DM**, Institute for Ageing and Health, Newcastle University, Newcastle upon  
38 Tyne, UK  
39  
40

41  
42 **Correspondence:** Zuzana Walker, Mental Health Unit, St. Margaret's Hospital, Epping,  
43 Essex, CM16 6TN, UK. email: [z.walker@ucl.ac.uk](mailto:z.walker@ucl.ac.uk)  
44  
45  
46  
47  
48  
49  
50  
51  
52  
53  
54  
55  
56  
57  
58  
59  
60

### **Contributions to the manuscript**

Zuzana Walker: Involved in conception and design of the study as well as being a member of the consensus panel; contributed to statistical analysis and interpretation; co-wrote initial draft of the manuscript, prepared final version of the manuscript

Ian McKeith: Involved in conception and design of the study as well as being a member of the consensus panel, contributed to and approved final version of the manuscript

Joanne Rodda: Involved in conception and design of the study, contributed to data analysis and interpretation; co-wrote initial and subsequent drafts of the manuscript, contributed to and approved final version of the manuscript

Tarik Qassem: Involved in conception and design of the study, data processing, analysis and interpretation, contributed to and approved final version of the manuscript

Klaus Tatsch: Involved in conception and design of the study; performed the visual analysis of the SPECT data, contributed to and approved final version of the manuscript

Jan Booij: Involved in conception and design of the study; performed the visual analysis of the SPECT data, contributed to and approved final version of the manuscript

Jacques Darcourt: Involved in conception and design of the study; performed the visual analysis of the SPECT data, contributed to and approved final version of the manuscript

John O'Brien: Involved in conception and design of the study as well as being a member of the consensus panel, contributed to and approved final version of the manuscript

### **Study funding and sponsorship:**

The data collection was sponsored by GE Healthcare who made data available for further analysis for the present study.

### **Author disclosure statements:**

At the time of the study Zuzana Walker, John O'Brien, Ian McKeith, Klaus Tatsch, Jan Booij and Jacques Darcourt have received consultancy payments from GE Healthcare. Joanne Rodda has received funding for neuroimaging research from GE Healthcare. Tarik Qassem has no disclosures.

## Abstract

**Objectives:** Dementia with Lewy bodies (DLB) accounts for 10-15% of dementia cases at autopsy and has distinct clinical features associated with earlier institutionalisation and a higher level of carer distress than are seen in Alzheimer's disease (AD). At present, there is on-going debate as to whether DLB is associated with a more rapid cognitive decline than AD. An understanding of the rate of decline of cognitive and non-cognitive symptoms in DLB may help patients and carers to plan for the future.

**Design:** In this cohort study we compared 100 AD and 58 DLB subjects at baseline and 12 month follow-up on cognitive and neuropsychiatric measures.

**Setting:** Patients were recruited from 40 European centres.

**Participants:** Subjects with mild-moderate dementia. Diagnosis of DLB or AD required agreement between consensus panel clinical diagnosis and visual rating of 123I-FP-CIT (dopamine transporter) SPECT neuroimaging.

**Outcome measures:** The Cambridge Cognitive Examination including Mini-Mental State Examination and Neuropsychiatric Inventory (NPI).

**Results:** The AD and DLB groups did not differ at baseline in terms of age, gender, Clinical Dementia Rating score and use of cholinesterase inhibitors or memantine. NPI and NPI carer distress scores were statistically significantly higher for DLB subjects at baseline and follow-up and there were no differences between AD and DLB in cognitive scores at baseline or follow-up. There was no significant difference in rate of progression of any of the variables analysed.

**Conclusions:** DLB subjects had more neuropsychiatric features at baseline and follow-up than AD, but we did not find any statistically significant difference in rate of progression between mild-moderate AD and DLB groups on cognitive or neuropsychiatric measures over a 12-month follow-up period.

## Article summary

### Article focus

- Dementia with Lewy bodies (DLB) has distinct neuropsychiatric features
- At present we do not know whether the poorer prognosis of DLB is due to a more rapid cognitive decline compared to Alzheimer's disease (AD)

### Key messages

- In this fairly large cohort of patients with DLB and AD, while there was no difference in level of cognitive impairment (CAMCOG score) at baseline and at 12 months follow-up, DLB patients had significantly higher NPI and NPI carer distress scores both at baseline and 12 months follow-up.
- Therefore the worse prognosis of DLB is likely to be mediated by neuropsychiatric or other symptoms and not only by cognitive decline

### Strengths of this study

- Inclusion of high number of subjects from 40 European clinical centres
- Well characterised cases with both consensus panel clinical diagnosis (three clinical experts) and dopaminergic transporter SPECT imaging

### Limitations of the study

- No autopsy data were available and therefore it is possible that more rapid cognitive decline may be present in pure DLB
- Only one year of follow-up
- There was higher attrition rate (no-follow-up assessment) in the DLB group and DLB patients that did not return for follow-up were more impaired than AD patients

## **Introduction**

Dementia with Lewy bodies (DLB) is the second most common form of neurodegenerative dementia and accounts for approximately 15% of cases of dementia at autopsy<sup>1</sup>. It is characterised by the central feature of a progressive dementia accompanied by one or more core features of fluctuations in cognition, visual hallucinations and spontaneous features of parkinsonism<sup>2</sup>.

Awareness of the rate of cognitive decline and also of non-cognitive symptoms can help carers and patients to adjust and plan appropriate lifestyle changes and to make arrangements for the future. This frequently involves making difficult decisions regarding treatment of psychiatric and motor symptoms and utilisation of limited resources available for patients with dementia.

1  
2  
3  
4 Since its recognition as a neurodegenerative disorder, a body of research has focused on  
5 the differentiation of DLB from other dementias, in particular Alzheimer's disease (AD), in  
6 terms of both cross-sectional and longitudinal clinical factors. In addition to the clinical  
7 syndrome described in the consensus diagnostic criteria, DLB is associated with higher  
8 levels of behavioural disturbance and caregiver distress, lower quality of life and greater  
9 demand on resources when compared to AD <sup>3,4</sup>. Despite these findings, there is uncertainty  
10 within the literature regarding progression and survival in DLB compared to AD. Studies  
11 have shown survival in DLB to be either comparable to <sup>5</sup> or shorter <sup>6</sup> than in AD. No  
12 differences in decline on global measures (e.g. Clinical Dementia Rating, CDR) have been  
13 reported <sup>7</sup>. Studies of the progression of cognitive impairment have generally reported a  
14 similar <sup>7,8</sup> or steeper <sup>5</sup> rate of decline in DLB when compared to AD. An exception to this was  
15 a study by Stavitsky et al. where AD patients had a steeper decline on cognitive and  
16 behavioural measures, although DLB patients had been more impaired at baseline <sup>9</sup>.

17  
18  
19  
20  
21  
22  
23  
24 Comparisons of longitudinal outcomes between DLB and AD to date have generally needed  
25 to trade off diagnostic accuracy against prospective study design. Autopsy studies have the  
26 benefit of definitive diagnosis, but are usually dependent on retrospective analysis of clinical  
27 data. Studies using clinical diagnosis often have the advantage of prospective study design  
28 but at the expense of diagnostic accuracy. Overall, the majority of studies of the 1996 clinical  
29 consensus criteria for DLB <sup>10</sup> have identified high specificity, with lower estimates of  
30 sensitivity. Whilst one study identified 83% sensitivity and 95% specificity, estimates of  
31 sensitivity from other studies have been as low as 23% <sup>11,12</sup> with reports of specificity ranging  
32 from 8-100%; the most frequent misdiagnosis of DLB is as AD <sup>13</sup>.

33  
34  
35  
36  
37  
38  
39  
40 The development of <sup>123</sup>I-FP-CIT SPECT now allows visualisation of striatal dopamine  
41 transporters, and consequentially dopaminergic degeneration *in vivo*, and differentiates  
42 between AD and DLB with a sensitivity and specificity of 78-88% and 94-100% respectively  
43 <sup>14</sup>; an abnormal visual rating on <sup>123</sup>I-FP-CIT SPECT was incorporated into the most recent  
44 revision of the consensus diagnostic criteria <sup>2</sup>. In the present study, our aim was to compare  
45 decline in cognitive, behavioural and global measures over a 12-month period in a  
46 prospectively followed cohort of subjects with either AD or DLB confirmed by consensus  
47 panel clinical diagnosis and normal (for AD) and abnormal (for DLB) <sup>123</sup>I-FP-CIT SPECT  
48 imaging.

## 49 50 51 52 53 54 55 56 57 58 59 60 **Methods**

1  
2  
3  
4 Data were collected as part of a phase 3 multicentre imaging study whose methodology is  
5 described in detail elsewhere <sup>15;16</sup>. In brief, patients were aged 55–90 years and met the  
6 criteria for dementia detailed in DSM-IV and fulfilled at least one of the following: consensus  
7 criteria for DLB <sup>10</sup> or NINCDS-ADRDA criteria for probable or possible AD <sup>17</sup>, or  
8 NINDS/AIREN criteria for probable or possible vascular dementia <sup>18</sup>. A Mini-Mental State  
9 Examination (MMSE) score at baseline of 10 or more was required to ensure patients could  
10 complete assessments <sup>19</sup>. Patients with dementia who developed parkinsonism more than 1  
11 year before the onset of dementia were deemed to have Parkinson's disease with dementia  
12 and were not included <sup>10</sup>. Those with structural imaging findings indicative of infarction in the  
13 region of the basal ganglia, including the internal capsule, were excluded. Use of medication  
14 known or suspected to interact with striatal binding of <sup>123</sup>I-FP-CIT was not permitted <sup>20</sup>.

21  
22  
23 The study was done in accordance with the current revision of the Declaration of Helsinki  
24 and the Good Clinical Practice: Consolidated Guideline approved by the International  
25 Conference on Harmonisation and applicable to national and local laws and regulations. At  
26 every participating site, the study protocol and all amendments were approved by an  
27 institutional review board or independent ethics committee. All patients and caregivers gave  
28 written informed consent.  
29  
30  
31  
32

33  
34  
35 Following inclusion in the initial study, participants were invited for clinical and  
36 neuropsychological re-assessment at 12 months.  
37  
38

39  
40 Clinical diagnosis at baseline, as previously reported, was established by an independent  
41 consensus panel of three specialist clinicians, who were provided with a patient profile  
42 compiled from quality-assured clinical data from the on-site investigators' case record forms  
43 and copies of on-site original source data <sup>15</sup>. The same panel reconvened to consider the  
44 baseline and the 12-month follow-up data to arrive at a second and final consensus  
45 diagnosis. This final consensus diagnosis was used to derive the cohort for the present  
46 study.  
47  
48  
49  
50

51  
52  
53 The following were undertaken at baseline and follow-up: MMSE, Unified Parkinson's  
54 Disease Rating Scale (UPDRS) III (motor section) <sup>21</sup>, modified Hoehn and Yahr staging <sup>22</sup>,  
55 clinical assessment of cognitive fluctuation scale <sup>23</sup>, the Cambridge Cognitive Examination—  
56  
57  
58  
59  
60

1  
2  
3  
4 revised version (CAMCOG-R)<sup>24</sup>, neuropsychiatric inventory with caregiver input (NPI-D)<sup>25</sup>,  
5 visual object and space perception (VOSP) battery<sup>26</sup> and clinical dementia rating (CDR)<sup>27</sup>.  
6 The Cornell Scale for Depression in Dementia<sup>28</sup> and the investigator's estimation of the  
7 patient's intelligence quotient level were completed at baseline, but not at follow-up. Results  
8 of MRI and CT scans and the on-site investigators' clinical diagnosis before imaging were  
9 also available. The consensus panel did not at any stage have access to <sup>123</sup>I-FP-CIT SPECT  
10 findings and was unaware of the patients' identities, and the names of the centres and the  
11 investigators. Before any cases were diagnosed, the consensus panel was asked to  
12 diagnose ten patients (separate to the study) for whom autopsy diagnosis was independently  
13 available. There was 100% concordance between the diagnoses made by the panel and at  
14 autopsy<sup>15</sup>. Individual panel members reviewed each study case, including the baseline  
15 consensus panel diagnosis and all subsequent information, before meeting to agree a final  
16 clinical diagnosis of probable DLB, possible DLB or non-DLB dementia. Patients in the non-  
17 DLB category were further allocated to probable or possible AD, probable or possible  
18 vascular dementia or other.  
19

20  
21 Within a few weeks of the baseline clinical diagnosis, SPECT images were acquired on a 2  
22 or 3 headed gamma camera (SPECT system) 3–6 hours after a single intravenous injection  
23 of 111-185 MBq of <sup>123</sup>I-FP-CIT<sup>29</sup> (DaTSCAN<sup>TM</sup>, the radiotracer was supplied by GE  
24 Healthcare). See McKeith *et al* for details<sup>15</sup>. Subjects underwent standard thyroid blocking.  
25 SPECT imaging was not repeated at follow-up. As previously described, three nuclear  
26 medicine physicians assessed scans, blind to diagnosis, using a 4 point scale (0 normal  
27 uptake; 1 unilateral putamen loss; 2 bilateral putamen loss; 3 virtually absent uptake)<sup>15</sup>, we  
28 used only the dichotomous division of normal (0) versus abnormal (1-3) images for analysis.  
29 For the present study, we combined the three independent reads and recorded the result of  
30 the scan as normal or abnormal if there was agreement between two or more raters.  
31  
32  
33  
34  
35  
36  
37  
38  
39  
40  
41  
42  
43  
44

45 For the purposes of the present study, we included only patients with complete data sets  
46 from both baseline (T1) and 1 year follow up (T2) assessments and with reliable images  
47 from the baseline <sup>123</sup>I-FP-CIT SPECT session (n=225). These patients were divided into two  
48 diagnostic groups (AD and DLB). Inclusion criteria for the AD group were a consensus  
49 diagnosis of possible or probable AD at 12 months follow-up in addition to a negative  
50 (normal) <sup>123</sup>I-FP-CIT SPECT read (n=100). To be included in the DLB group, patients were  
51 required to have a consensus diagnosis of probable DLB at 12 months follow up and to have  
52 a positive (abnormal) <sup>123</sup>I-FP-CIT SPECT image read (n=58). Patients with a dementia  
53 diagnosis other than possible or probable AD or probable DLB were excluded (n=50); [see](#)  
54  
55  
56  
57  
58  
59  
60

flowchart. Figure. Patients with a  $^{123}\text{I}$ -FP-CIT SPECT image read that was not in keeping with the consensus clinical diagnosis at 12 months were also excluded (n=14 probable DLB, 3 AD).

Figure: Flowchart of subjects included in the study

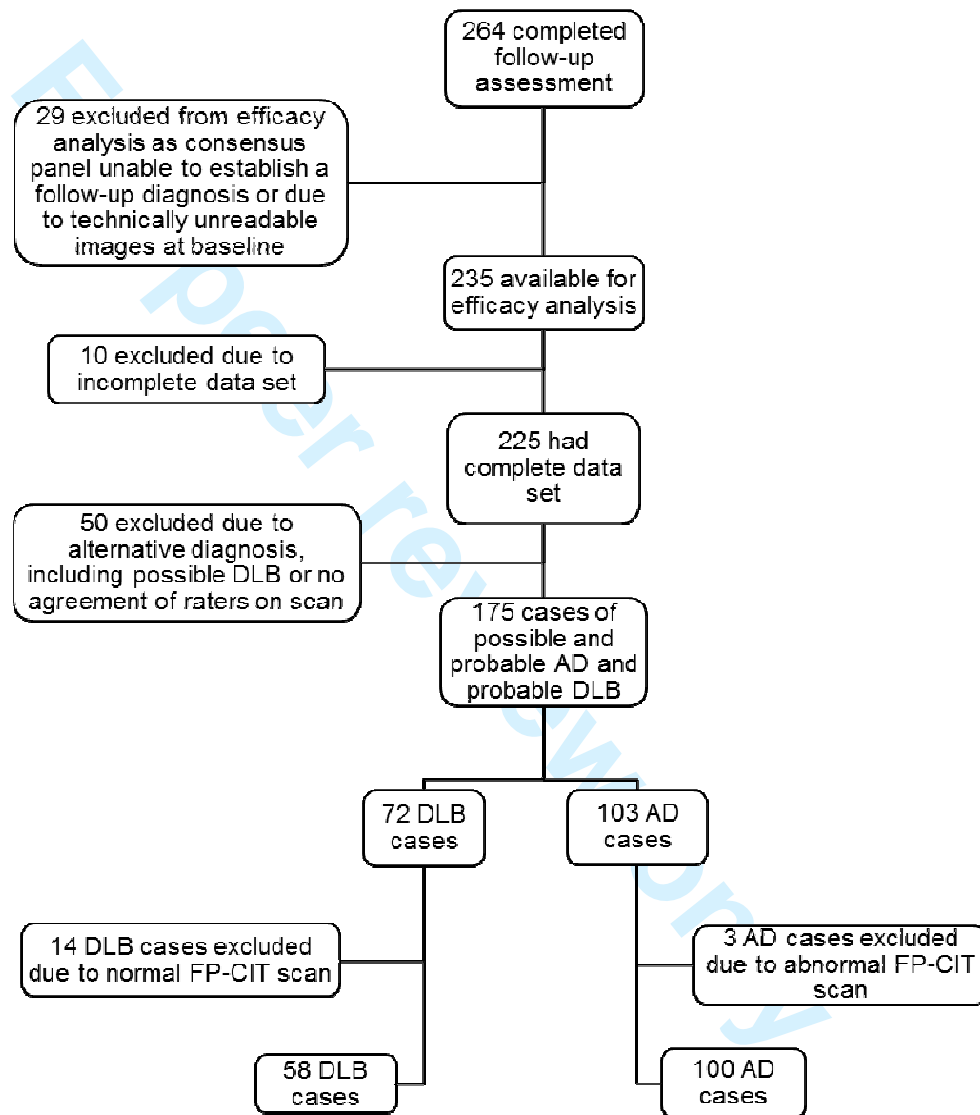

### Statistical analysis

Data were analysed using SPSS version 18. We compared baseline and 12-month follow-up data and change over time for the AD and DLB groups.  $\chi^2$  tests were used to assess differences between the diagnostic groups (AD and DLB) with respect to gender and medication use at baseline. For normally distributed variables, t-tests were used for



1  
2  
3  
4 between-group comparisons of baseline and follow-up variables. Mann Whitney U-tests  
5 were used for non-normally distributed baseline and follow-up data. Repeated measures  
6 ANOVA was used for analysis of group x time interactions (comparison of change in  
7 variables over time in each group). General Linear Models with fixed effect were used to  
8 adjust for the difference in NPI scores and the scores on the Cornell Scale for Depression in  
9 Dementia at baseline  
10  
11  
12  
13  
14  
15  
16  
17  
18  
19  
20  
21  
22  
23  
24  
25  
26  
27  
28  
29  
30  
31  
32  
33  
34  
35  
36  
37  
38  
39  
40  
41  
42  
43  
44  
45  
46  
47  
48  
49  
50  
51  
52  
53  
54  
55  
56  
57  
58  
59  
60

## Results

|                                                            |           | AD<br>(n=100) | DLB<br>(n=58) | P      |
|------------------------------------------------------------|-----------|---------------|---------------|--------|
| Gender (M:F)                                               | M         | 48 [48%]      | 37 [64%]      | 0.06   |
|                                                            | F         | 52 [52%]      | 21 [36%]      |        |
| Age in years at <sup>123</sup> I-FP-CIT SPECT session      |           | 74.9 (7.3)    | 74.2 (6.1)    | 0.53   |
| Cornell Scale for Depression in Dementia <u>(baseline)</u> |           | 3.8 (3.3)     | 6.6 (3.4)     | <0.001 |
| Cholinesterase inhibitor                                   |           | 82 [82%]      | 45 [76%]      | 0.50   |
| Memantine                                                  |           | 9 [9%]        | 2 [3%]        | 0.19   |
| Neuroleptic medication                                     |           | 4 [4%]        | 9 [16%]       | 0.01   |
| Clinical Dementia Rating <u>(baseline)</u>                 |           | 1.2 (0.69)    | 1.3 (0.66)    | 0.3    |
| MMSE score (SD)                                            | Baseline  | 21.5 (4.5)    | 21.4 (3.9)    | 0.85   |
|                                                            | Follow-up | 19.0 (6.2)    | 18.5 (6.0)    | 0.65   |
|                                                            | Change    | 2.6 (4.0)     | 3.1 (4.3)     | 0.40   |
| CAMCOG score (SD)                                          | Baseline  | 66.3 (15.6)   | 66.0 (13.5)   | 0.89   |
|                                                            | Follow-up | 59.5 (20.3)   | 56.3 (19.7)   | 0.35   |
|                                                            | Change    | 7.5 (10.6)    | 9.0 (11.9)    | 0.429  |
| NPI score (SD)                                             | Baseline  | 9.7 (10.3)    | 19.8 (14.6)   | <0.001 |
|                                                            | Follow-up | 12.3 (13.3)   | 24.2 (17.4)   | <0.001 |
|                                                            | Change    | 2.5 (14.8)    | 3.8 (15.5)    | 0.59   |
| NPI-carer score (SD)                                       | Baseline  | 5.8 (6.0)     | 10.8 (8.0)    | <0.001 |
|                                                            | Follow-up | 5.8 (5.7)     | 11.8 (8.6)    | <0.001 |
|                                                            | Change    | -0.05 (6.4)   | 0.8 (7.1)     | 0.44   |
| Fluctuations                                               | Baseline  | 0.6 (2.1)     | 6.0 (4.5)     | <0.001 |
|                                                            | Follow up | 0.4 (1.7)     | 6.9 (4.1)     | <0.001 |
|                                                            | Change    | -0.2 (2.4)    | 0.8 (4.1)     | 0.07   |
| CAMCOG Executive function                                  | Baseline  | 11.9 (5.2)    | 11.1 (4.7)    | 0.33   |
|                                                            | Follow-up | 10.5 (5.4)    | 9.4 (5.0)     | 0.24   |
|                                                            | Change    | 1.5 (3.6)     | 1.4 (4.0)     | 0.83   |

Table: Baseline characteristics and scores on clinical scales and cognitive testing at baseline and 12 month follow-up and change in scores between time points for AD and DLB groups.

Data are presented as mean (SD) or number (%). P= P-values (ANOVA).

Baseline and follow-up data for the DLB and AD groups are presented in the table. The groups did not differ in terms of age or gender. There were no between-group baseline differences in terms of CDR or use of cholinesterase inhibitors or memantine. The DLB

1  
2  
3  
4 group had a statistically significant higher mean depression score at baseline and higher  
5 scores on the NPI, NPI carer distress and clinical assessment of cognitive fluctuation scales  
6 at both baseline and 12-month follow-up ( $p < 0.001$ ). There were no differences between the  
7 groups on cognitive scores at either baseline or follow-up. No significant differences in  
8 change in scores between baseline and 12-month follow-up for any of the variables analysed  
9 were identified. Results of analysis did not change when data were stratified according to  
10 gender. There was also no statistically significant difference between DLB and AD in the  
11 change of CAMCOG score after adjustment for scores on NPI and Cornell Scale for  
12 Depression scores. There were numerically greater changes (more decline) between  
13 baseline and follow-up on cognition, fluctuation and on measures of neuropsychiatric  
14 symptoms in the DLB patients but this did not reach statistical significance. The lack of a  
15 significant difference on the cognitive performance between the DLB and AD groups is  
16 unlikely to be due to lack of power, therefore type II error, as the effect size of that difference  
17 was very small (0.02-0.07) and only a sample size of 1685 subjects would have shown a  
18 significant difference.

19  
20  
21  
22  
23  
24  
25  
26  
27  
28  
29  
30 A higher number of DLB patients (25) compared to AD patients (19) did not return for a  
31 follow-up visit. DLB patients lost to follow-up were significantly more cognitively impaired  
32 than AD patients lost to follow-up at baseline on MMSE (score 17.3 vs 22.2), CAMCOG  
33 (score 53.1 vs 66.7) and executive function (score 8.4 vs 13.3).

## 34 35 36 37 38 Discussion

39  
40 In a prospectively-followed sample of patients with clinical consensus panel and dopamine  
41 transporter SPECT confirmed diagnosis of AD or DLB, cross-sectional assessments  
42 identified expected between-group similarities and differences in cognitive scores and  
43 clinical scales in addition to a higher level of carer distress in the relating to the symptoms of  
44 DLB patients-DLB group. We identified no differences in rate of progression of cognitive or  
45 neuropsychiatric variables over a 12-month follow-up period. Our inclusion of only patients  
46 whose consensus clinical diagnosis was in keeping with neuroimaging results make it likely  
47 that diagnostic accuracy was very high. Our sample was drawn from 40 different centres in  
48 40 European countries and is thus representative of the clinical population in Europe rather  
49 than a single academic centre.

1  
2  
3  
4 AD and DLB groups were well-matched in terms of age and degree of cognitive impairment  
5 at baseline. The findings of higher scores on the NPI, clinician assessment of fluctuation and  
6 Cornell Scale for Depression in dementia were expected given the recognised criteria for  
7 diagnosis of DLB <sup>2</sup>.  
8  
9

10  
11  
12 | NPI score was higher at both time points in DLB, despite similar cognitive and baseline CDR  
13 scores; this was associated with higher levels of caregiver distress and is in keeping with  
14 other published data <sup>4,30</sup>. Severity of neuropsychiatric symptoms in AD <sup>31</sup> and DLB <sup>32</sup> has  
15 been shown to be a predictor of both caregiver distress and nursing home placement.  
16 Caregiver distress has also been shown to be an independent risk factor for nursing home  
17 placement in dementia <sup>33</sup>. It is possible that the shorter time to nursing home placement that  
18 has been reported in DLB compared to AD <sup>34</sup> is related to neuropsychiatric symptoms and  
19 associated caregiver distress. Not all studies are consistent, however, and marginal <sup>6</sup> or no  
20 differences <sup>8</sup> in time to placement have also been reported. Furthermore, costs of care in  
21 DLB and AD have been shown to correlate with impairments in activities of daily living and  
22 not NPI scores <sup>4</sup>.  
23  
24  
25  
26  
27  
28  
29  
30  
31

32 Severity of neuropsychiatric symptomatology, and hallucinations in particular, has also been  
33 associated with steeper decline in cognitive scores and increased risk of mortality and  
34 institutionalisation in AD, independent of antipsychotic drug use <sup>35,36</sup>. These studies have  
35 lacked autopsy confirmation of diagnosis and it is possible that AD groups included  
36 individuals with undiagnosed DLB, who are more likely to experience hallucinations. We are  
37 not aware of any published data related to the impact of neuropsychiatric symptom severity  
38 on illness progression and survival in DLB.  
39  
40  
41  
42  
43  
44

45 We did not identify any between-group differences in change over time of any of the  
46 variables examined, i.e. NPI, fluctuations and cognitive performance. It is possible that the  
47 lack of detectable difference in decline of NPI and fluctuation scores over time is related to  
48 the already high scores at baseline in DLB. The majority of studies of the rate of cognitive  
49 decline in DLB vs AD have also reported no differences, e.g. <sup>7,8</sup>, although the earliest reports  
50 were of more rapid decline in cognition in DLB <sup>37</sup>, as were more recent studies <sup>5</sup>. Several  
51 studies have reported relatively preserved cognitive scores, particularly in recall, before  
52 death in DLB compared to AD <sup>5</sup>.  
53  
54  
55  
56  
57  
58  
59  
60

1  
2  
3  
4 It has been suggested that DLB may be associated with a more rapid decline in global  
5 measures of dementia severity or measures of activities of daily living whilst cognitive  
6 performance is relatively preserved. However, no significant differences in change in CDR  
7 score over time between DLB and AD groups have yet been identified <sup>7</sup>. We did not examine  
8 performance on activities of daily living. Cross-sectional assessments of activities of living  
9 have reported higher levels of impairment in DLB than AD <sup>9,30</sup>, which may be related to  
10 extrapyramidal motor symptoms <sup>38</sup>. Longitudinal data, however, suggest no difference or a  
11 marginal difference in rate of decline of activities of daily living between AD and DLB <sup>9</sup>.  
12  
13  
14  
15  
16  
17  
18

19 Whilst ours and the majority of studies do not support the idea of a more rapid decline in  
20 cognition in DLB, the available literature is split more evenly between findings of either  
21 similar or shorter survival in DLB compared to AD. One possibility is that reports of worse  
22 outcomes in DLB are related to increased frequency of antipsychotic use as a result of  
23 greater severity of neuropsychiatric symptoms. Whilst more DLB than AD participants were  
24 prescribed neuroleptics in the present study, no differences in rate of progression were  
25 identified. Previous studies of cognitive decline in AD and DLB that have presented data on  
26 neuroleptic prescribing did not report any differences between the groups in use of these  
27 medications <sup>8,39</sup>. In terms of survival, both early <sup>40</sup> and more recent <sup>6,8</sup> studies have reported  
28 shorter survival in DLB vs AD, despite likely changes in neuroleptic prescribing over this time  
29 as a result of better understanding of the potentially harmful effects in both DLB <sup>2,10</sup> and  
30 dementia as a whole. It therefore seems unlikely that reported differences in survival  
31 between DLB and AD can be entirely accounted for by antipsychotic use.  
32  
33  
34  
35  
36  
37  
38  
39  
40

41 The literature surrounding the differences in longitudinal outcomes in DLB and AD is  
42 therefore not easy to interpret. Overall, studies report outcomes in DLB that are either no  
43 different from or worse than in AD. Some of the difficulties involved in interpreting and  
44 comparing these findings are the differences in study design, use of clinical rather than  
45 pathological diagnosis, differing pathological definitions, and retrospective analysis of clinical  
46 data. In addition, studies often rely on relative's reports on the onset of dementia, or use as  
47 baseline the time of referral, diagnosis or entry into the study. None of these methods  
48 necessarily identify equivalent disease stages and these difficulties highlight the complexity  
49 of the task of comparing the rate of decline between two disorders with different clinical  
50 phenotypes. In DLB, episodic memory is relatively spared in the early stages, but the  
51 presence of attentional and visuospatial impairments, visual hallucinations or movement  
52 disorder might be more disabling. Comparisons between AD and DLB are therefore not  
53  
54  
55  
56  
57  
58  
59  
60

1  
2  
3  
4 straightforward, and it is hard to define what is an “equivalent” disease stage. The picture is  
5 further complicated by the frequent overlap of AD and DLB neuropathology and the insidious  
6 onset of both of these conditions.  
7  
8  
9

10  
11 Our study would have been improved by a longer duration of follow-up and a more detailed  
12 breakdown of cognitive, behavioural and clinical measures. Exclusion of individuals with  
13 severe dementia and higher attrition (not returning for follow-up visit) of DLB cases with  
14 more severe cognitive impairment precluded detection of differences in progression that are  
15 present only in later disease stages. Larger cohorts of patients which could be stratified by  
16 stages of severity of dementia are needed to examine this possibility. DLB group had a  
17 higher mean depression score at baseline and more patients took a neuroleptic. Both  
18 neuroleptics and antidepressants have been shown to have detrimental effect on patients  
19 with dementia and could lead to faster progression but this did not seem to be the case over  
20 the duration of one year. Without autopsy diagnosis, we were not able to differentiate  
21 patients with pure and combined pathology.  
22  
23  
24  
25  
26  
27  
28  
29

30  
31 In conclusion, on global cognitive measures, we did not find any difference in rate of  
32 progression between mild-moderate AD and DLB groups over a one-year period of  
33 observation. Cognitive decline is only one aspect of dementia and other impairments may in  
34 fact be more important and disabling.  
35  
36  
37  
38

### 39 **Acknowledgements**

40  
41 GE Healthcare financially supported the collection of data. The study was initiated by the first  
42 author. Tim Whitfield provided help during the preparation of the final version of the  
43 manuscript.  
44  
45  
46  
47  
48  
49  
50  
51  
52  
53  
54  
55  
56  
57  
58  
59  
60

## Reference List

1. Holmes C, Cairns N, Lantos P et al. Validity of current clinical criteria for Alzheimer's disease, vascular dementia and dementia with Lewy bodies. *Br.J.Psychiatry* 1999;**174**:45-50.
2. McKeith IG, Dickson DW, Lowe J et al. Diagnosis and management of dementia with Lewy bodies: third report of the DLB Consortium. *Neurology* 2005;**65**:1863-72.
3. Bostrom F, Jonsson L, Minthon L et al. Patients with dementia with lewy bodies have more impaired quality of life than patients with Alzheimer disease. *Alzheimer Dis.Assoc.Disord.* 2007;**21**:150-4.
4. Bostrom F, Jonsson L, Minthon L et al. Patients with Lewy body dementia use more resources than those with Alzheimer's disease. *Int.J.Geriatr.Psychiatry* 2007;**22**:713-9.
5. Nelson PT, Kryscio RJ, Jicha GA et al. Relative preservation of MMSE scores in autopsy-proven dementia with Lewy bodies. *Neurology* 2009;**73**:1127-33.
6. Williams MM, Xiong C, Morris JC et al. Survival and mortality differences between dementia with Lewy bodies vs Alzheimer disease. *Neurology* 2006;**67**:1935-41.
7. Johnson DK, Morris JC, Galvin JE. Verbal and visuospatial deficits in dementia with Lewy bodies. *Neurology* 2005;**65**:1232-8.
8. Hanyu H, Sato T, Hirao K et al. Differences in clinical course between dementia with Lewy bodies and Alzheimer's disease. *Eur.J.Neurol.* 2009;**16**:212-7.
9. Stavitsky K, Brickman AM, Scarmeas N et al. The progression of cognition, psychiatric symptoms, and functional abilities in dementia with Lewy bodies and Alzheimer disease. *Arch.Neurol.* 2006;**63**:1450-6.
10. McKeith IG, Galasko D, Kosaka K et al. Consensus guidelines for the clinical and pathologic diagnosis of dementia with Lewy bodies (DLB): report of the consortium on DLB international workshop. *Neurology* 1996;**47**:1113-24.
11. Lopez OL, Becker JT, Kaufer DI et al. Research evaluation and prospective diagnosis of dementia with Lewy bodies. *Arch.Neurol* 2002;**59**:43-6.

12. O'Brien JT, Colloby S, Fenwick J et al. Dopamine transporter loss visualized with FP-CIT SPECT in the differential diagnosis of dementia with Lewy bodies. *Arch.Neurol.* 2004;**61**:919-25.
13. Barker WW, Luis CA, Kashuba A et al. Relative frequencies of Alzheimer disease, Lewy body, vascular and frontotemporal dementia, and hippocampal sclerosis in the State of Florida Brain Bank. *Alzheimer Dis.Assoc.Disord.* 2002;**16**:203-12.
14. Walker Z, Jaros E, Walker RW et al. Dementia with lewy bodies: A comparison of clinical diagnosis, FP-CIT SPECT imaging and autopsy. *J.Neurol.Neurosurg.Psychiatry* 2007.
15. McKeith I, O'Brien JT, Walker Z et al. Sensitivity and specificity of dopamine transporter imaging with 123I-FP-CIT SPECT in dementia with Lewy bodies: a phase III, multicentre study. *Lancet Neurol.* 2007;**6**:305-13.
16. O'Brien JT, McKeith IG, Walker Z et al. Diagnostic accuracy of 123I-FP-CIT SPECT in possible dementia with Lewy bodies. *Br.J.Psychiatry* 2009;**194**:34-9.
17. McKhann G, Drachman D, Folstein M et al. Clinical diagnosis of Alzheimer's disease: report of the NINCDS-ADRDA Work Group under the auspices of Department of Health and Human Services Task Force on Alzheimer's Disease. *Neurology* 1984;**34**:939-44.
18. Roman GC, Tatemichi TK, Erkinjuntti T et al. Vascular dementia: diagnostic criteria for research studies. Report of the NINDS-AIREN International Workshop. *Neurology* 1993;**43**:250-60.
19. Folstein MF, Folstein SE, McHugh PR. "Mini-mental state". A practical method for grading the cognitive state of patients for the clinician. *J.Psychiatr.Res.* 1975;**12**:189-98.
20. Booij J, Kemp P. Dopamine transporter imaging with [(123)I]FP-CIT SPECT: potential effects of drugs. *Eur.J.Nucl.Med.Mol.Imaging* 2008;**35**:424-38.
21. Fahn S, Elton RL. Unified Parkinson's Disease Rating Scale. In: Fahn S, Marsden DC, Goldstein M, Calne DB, eds. *Recent Developments in Parkinson's Disease.* McMillan 1987.



- 1
- 2
- 3
- 4 22. Hoehn MM, Yahr MD. Parkinsonism: onset, progression, and mortality. 1967.
- 5 *Neurology* 1998;**50**:318.
- 6
- 7
- 8 23. Walker MP, Ayre GA, Cummings JL et al. The Clinician Assessment of Fluctuation and
- 9 the One Day Fluctuation Assessment Scale. Two methods to assess fluctuating
- 10 confusion in dementia. *Br.J.Psychiatry* 2000;**177**:252-6.
- 11
- 12
- 13 24. Huppert FA, Brayne C, Gill C et al. CAMCOG--a concise neuropsychological test to
- 14 assist dementia diagnosis: socio-demographic determinants in an elderly population
- 15 sample. *Br.J.Clin.Psychol.* 1995;**34 ( Pt 4)**:529-41.
- 16
- 17
- 18 25. Cummings JL, Mega M, Gray K et al. The Neuropsychiatric Inventory: comprehensive
- 19 assessment of psychopathology in dementia. *Neurology* 1994;**44**:2308-14.
- 20
- 21
- 22 26. Warrington EK, James M. A new test of object decision: 2D silhouettes featuring a
- 23 minimal view. *Cortex* 1991;**27**:370-83.
- 24
- 25
- 26
- 27 27. Hughes CP, Berg L, Danziger WL et al. A new clinical scale for the staging of
- 28 dementia. *Br.J.Psychiatry* 1982;**140**:566-72.
- 29
- 30
- 31 28. Alexopoulos GS, Abrams RC, Young RC et al. Cornell Scale for Depression in
- 32 Dementia. *Biol.Psychiatry* 1988;**23**:271-84.
- 33
- 34
- 35 29. Booij J, Hemelaar TG, Speelman JD et al. One-day protocol for imaging of the
- 36 nigrostriatal dopaminergic pathway in Parkinson's disease by [123I]FPCIT SPECT.
- 37 *J.Nucl.Med.* 1999;**40**:753-61.
- 38
- 39
- 40
- 41 30. Ricci M, Guidoni SV, Sepe-Monti M et al. Clinical findings, functional abilities and
- 42 caregiver distress in the early stage of dementia with Lewy bodies (DLB) and
- 43 Alzheimer's disease (AD). *Arch.Gerontol.Geriatr.* 2009;**49**:e101-e104.
- 44
- 45
- 46 31. Rocca P, Leotta D, Liffredo C et al. Neuropsychiatric Symptoms Underlying Caregiver
- 47 Stress and Insight in Alzheimer's Disease. *Dement.Geriatr.Cogn Disord.* 2010;**30**:57-
- 48 63.
- 49
- 50
- 51
- 52 32. Leggett AN, Zarit S, Taylor A et al. Stress and Burden Among Caregivers of Patients
- 53 with Lewy Body Dementia. *Gerontologist* 2010.
- 54
- 55
- 56 33. Gaugler JE, Yu F, Krichbaum K et al. Predictors of nursing home admission for
- 57 persons with dementia. *Med.Care* 2009;**47**:191-8.
- 58
- 59
- 60

- 1  
2  
3  
4 34. Rongve, A, Skogseth, R, and Aarsland, D. Risk of nursing home placement in  
5 dementia with Lewy bodies and Alzheimer's dementia. *Alzheimer's and Dementia* 5(4  
6 Supplement), 79. 2010.  
7  
8 Ref Type: Abstract  
9  
10  
11 35. Wilson RS, Tang Y, Aggarwal NT et al. Hallucinations, cognitive decline, and death in  
12 Alzheimer's disease. *Neuroepidemiology* 2006;**26**:68-75.  
13  
14 36. Scarmeas N, Brandt J, Albert M et al. Delusions and hallucinations are associated with  
15 worse outcome in Alzheimer disease. *Arch.Neurol.* 2005;**62**:1601-8.  
16  
17 37. Olichney JM, Galasko D, Salmon DP et al. Cognitive decline is faster in Lewy body  
18 variant than in Alzheimer's disease. *Neurology* 1998;**51**:351-7.  
19  
20 38. McKeith IG, Rowan E, Askew K et al. More severe functional impairment in dementia  
21 with lewy bodies than Alzheimer disease is related to extrapyramidal motor  
22 dysfunction. *Am.J.Geriatr.Psychiatry* 2006;**14**:582-8.  
23  
24 39. Weiner MF, Risser RC, Cullum CM et al. Alzheimer's disease and its Lewy body  
25 variant: a clinical analysis of postmortem verified cases. *Am.J.Psychiatry*  
26 1996;**153**:1269-73.  
27  
28 40. Ballard C, Holmes C, McKeith I et al. Psychiatric morbidity in dementia with Lewy  
29 bodies: a prospective clinical and neuropathological comparative study with  
30 Alzheimer's disease. *Am.J.Psychiatry* 1999;**156**:1039-45.  
31  
32  
33  
34  
35  
36  
37  
38  
39  
40  
41  
42  
43  
44  
45  
46  
47  
48  
49  
50  
51  
52  
53  
54  
55  
56  
57  
58  
59  
60

1  
2  
3  
4  
5  
6  
7  
8  
9  
10  
11  
12  
13  
14  
15  
16  
17  
18  
19  
20  
21  
22  
23  
24  
25  
26  
27  
28  
29  
30  
31  
32  
33  
34  
35  
36  
37  
38  
39  
40  
41  
42  
43  
44  
45  
46  
47  
48  
49  
50  
51  
52  
53  
54  
55  
56  
57  
58  
59  
60

Please complete a relevant reporting checklist. More details are available in our Instructions for Authors  
- <http://bmjopen.bmj.com/site/about/guidelines.xhtml>

For peer review only

STROBE 2007 (v4) Statement—Checklist of items that should be included in reports of *cohort studies*

| Section/Topic                | Item # | Recommendation                                                                                                                                                                       | Reported on page # |
|------------------------------|--------|--------------------------------------------------------------------------------------------------------------------------------------------------------------------------------------|--------------------|
| Title and abstract           | 1      | (a) Indicate the study's design with a commonly used term in the title or the abstract                                                                                               | 1                  |
|                              |        | (b) Provide in the abstract an informative and balanced summary of what was done and what was found                                                                                  | 4                  |
| <b>Introduction</b>          |        |                                                                                                                                                                                      |                    |
| Background/rationale         | 2      | Explain the scientific background and rationale for the investigation being reported                                                                                                 | 6                  |
| Objectives                   | 3      | State specific objectives, including any prespecified hypotheses                                                                                                                     | 7                  |
| <b>Methods</b>               |        |                                                                                                                                                                                      |                    |
| Study design                 | 4      | Present key elements of study design early in the paper                                                                                                                              | 7                  |
| Setting                      | 5      | Describe the setting, locations, and relevant dates, including periods of recruitment, exposure, follow-up, and data collection                                                      | 7                  |
| Participants                 | 6      | (a) Give the eligibility criteria, and the sources and methods of selection of participants. Describe methods of follow-up                                                           | 9                  |
|                              |        | (b) For matched studies, give matching criteria and number of exposed and unexposed                                                                                                  |                    |
| Variables                    | 7      | Clearly define all outcomes, exposures, predictors, potential confounders, and effect modifiers. Give diagnostic criteria, if applicable                                             | 8                  |
| Data sources/<br>measurement | 8*     | For each variable of interest, give sources of data and details of methods of assessment (measurement). Describe comparability of assessment methods if there is more than one group | 8                  |
| Bias                         | 9      | Describe any efforts to address potential sources of bias                                                                                                                            | 9                  |
| Study size                   | 10     | Explain how the study size was arrived at                                                                                                                                            | 9                  |
| Quantitative variables       | 11     | Explain how quantitative variables were handled in the analyses. If applicable, describe which groupings were chosen and why                                                         | 9                  |
| Statistical methods          | 12     | (a) Describe all statistical methods, including those used to control for confounding                                                                                                | 9                  |
|                              |        | (b) Describe any methods used to examine subgroups and interactions                                                                                                                  | 9                  |
|                              |        | (c) Explain how missing data were addressed                                                                                                                                          | 9                  |
|                              |        | (d) If applicable, explain how loss to follow-up was addressed                                                                                                                       | 9                  |
|                              |        | (e) Describe any sensitivity analyses                                                                                                                                                | 9                  |
| <b>Results</b>               |        |                                                                                                                                                                                      |                    |

|                          |     |                                                                                                                                                                                                              |     |
|--------------------------|-----|--------------------------------------------------------------------------------------------------------------------------------------------------------------------------------------------------------------|-----|
| Participants             | 13* | (a) Report numbers of individuals at each stage of study—eg numbers potentially eligible, examined for eligibility, confirmed eligible, included in the study, completing follow-up, and analysed            | 11  |
|                          |     | (b) Give reasons for non-participation at each stage                                                                                                                                                         | 9   |
|                          |     | (c) Consider use of a flow diagram                                                                                                                                                                           | n/a |
| Descriptive data         | 14* | (a) Give characteristics of study participants (eg demographic, clinical, social) and information on exposures and potential confounders                                                                     | 10  |
|                          |     | (b) Indicate number of participants with missing data for each variable of interest                                                                                                                          | n/a |
|                          |     | (c) Summarise follow-up time (eg, average and total amount)                                                                                                                                                  | 7   |
| Outcome data             | 15* | Report numbers of outcome events or summary measures over time                                                                                                                                               | 9   |
| Main results             | 16  | (a) Give unadjusted estimates and, if applicable, confounder-adjusted estimates and their precision (eg, 95% confidence interval). Make clear which confounders were adjusted for and why they were included | n/a |
|                          |     | (b) Report category boundaries when continuous variables were categorized                                                                                                                                    | n/a |
|                          |     | (c) If relevant, consider translating estimates of relative risk into absolute risk for a meaningful time period                                                                                             | n/a |
| Other analyses           | 17  | Report other analyses done—eg analyses of subgroups and interactions, and sensitivity analyses                                                                                                               | n/a |
| <b>Discussion</b>        |     |                                                                                                                                                                                                              |     |
| Key results              | 18  | Summarise key results with reference to study objectives                                                                                                                                                     | 11  |
| <b>Limitations</b>       |     |                                                                                                                                                                                                              |     |
| Interpretation           | 20  | Give a cautious overall interpretation of results considering objectives, limitations, multiplicity of analyses, results from similar studies, and other relevant evidence                                   | 14  |
| Generalisability         | 21  | Discuss the generalisability (external validity) of the study results                                                                                                                                        | 13  |
| <b>Other information</b> |     |                                                                                                                                                                                                              |     |
| Funding                  | 22  | Give the source of funding and the role of the funders for the present study and, if applicable, for the original study on which the present article is based                                                | 2   |

\*Give information separately for cases and controls in case-control studies and, if applicable, for exposed and unexposed groups in cohort and cross-sectional studies.

**Note:** An Explanation and Elaboration article discusses each checklist item and gives methodological background and published examples of transparent reporting. The STROBE checklist is best used in conjunction with this article (freely available on the Web sites of PLoS Medicine at <http://www.plosmedicine.org/>, Annals of Internal Medicine at <http://www.annals.org/>, and Epidemiology at <http://www.epidem.com/>). Information on the STROBE Initiative is available at [www.strobe-statement.org](http://www.strobe-statement.org).



**Comparison of cognitive decline between dementia with  
Lewy bodies and Alzheimer's disease: a cohort study**

|                                    |                                                                                                                                                                                                                                                                                                                                                                                                                                                                                                                                                                                                                                                                                                                                       |
|------------------------------------|---------------------------------------------------------------------------------------------------------------------------------------------------------------------------------------------------------------------------------------------------------------------------------------------------------------------------------------------------------------------------------------------------------------------------------------------------------------------------------------------------------------------------------------------------------------------------------------------------------------------------------------------------------------------------------------------------------------------------------------|
| Journal:                           | <i>BMJ Open</i>                                                                                                                                                                                                                                                                                                                                                                                                                                                                                                                                                                                                                                                                                                                       |
| Manuscript ID:                     | bmjopen-2011-000380.R2                                                                                                                                                                                                                                                                                                                                                                                                                                                                                                                                                                                                                                                                                                                |
| Article Type:                      | Research                                                                                                                                                                                                                                                                                                                                                                                                                                                                                                                                                                                                                                                                                                                              |
| Date Submitted by the Author:      | 12-Dec-2011                                                                                                                                                                                                                                                                                                                                                                                                                                                                                                                                                                                                                                                                                                                           |
| Complete List of Authors:          | Walker, Zuzana; University College London, Mental Health Sciences<br>McKeith, Ian; Institute for Ageing and Health, Newcastle University,<br>Rodda, Joanne; University College London, Research Department of Mental<br>Health Sciences<br>Qassem, Tarik; North Essex Partnership Foundation NHS Trust, Mental<br>Health Unit; Ain Shams University, Institute of Psychiatry<br>Tatsch, Klaus; Städtisches Klinikum Karlsruhe, Department of Nuclear<br>Medicine<br>Booij, Jan; Academic Medical Centre, Department of Nuclear Medicine<br>Darcourt, Jacques; University of Nice Sophia-Antipolis, Centre Anoine<br>Lacassagne Department of Nuclear Medicine<br>O'Brien, John; Newcastle University, Institute for Ageing and Health |
| <b>Primary Subject<br>Heading</b>: | Neurology                                                                                                                                                                                                                                                                                                                                                                                                                                                                                                                                                                                                                                                                                                                             |
| Secondary Subject Heading:         | Mental health                                                                                                                                                                                                                                                                                                                                                                                                                                                                                                                                                                                                                                                                                                                         |
| Keywords:                          | Cognitive disorders, ALZHEIMER'S DISEASE, LEWY BODY, Dementia <<br>NEUROLOGY, SPECT, FUNCTIONAL IMAGING                                                                                                                                                                                                                                                                                                                                                                                                                                                                                                                                                                                                                               |
|                                    |                                                                                                                                                                                                                                                                                                                                                                                                                                                                                                                                                                                                                                                                                                                                       |

SCHOLARONE™  
Manuscripts

1  
2  
3  
4  
5  
6  
7  
8  
9  
10  
11  
12  
13  
14  
15  
16  
17  
18  
19  
20  
21  
22  
23  
24  
25  
26  
27  
28  
29  
30  
31  
32  
33  
34  
35  
36  
37  
38  
39  
40  
41  
42  
43  
44  
45  
46  
47  
48  
49  
50  
51  
52  
53  
54  
55  
56  
57  
58  
59  
60

Please complete a relevant reporting checklist. More details are available in our Instructions for Authors  
- <http://bmjopen.bmj.com/site/about/guidelines.xhtml>

For peer review only

STROBE 2007 (v4) Statement—Checklist of items that should be included in reports of *cohort studies*

| Section/Topic                | Item # | Recommendation                                                                                                                                                                       | Reported on page # |
|------------------------------|--------|--------------------------------------------------------------------------------------------------------------------------------------------------------------------------------------|--------------------|
| Title and abstract           | 1      | (a) Indicate the study's design with a commonly used term in the title or the abstract                                                                                               | 1                  |
|                              |        | (b) Provide in the abstract an informative and balanced summary of what was done and what was found                                                                                  | 4                  |
| <b>Introduction</b>          |        |                                                                                                                                                                                      |                    |
| Background/rationale         | 2      | Explain the scientific background and rationale for the investigation being reported                                                                                                 | 6                  |
| Objectives                   | 3      | State specific objectives, including any prespecified hypotheses                                                                                                                     | 7                  |
| <b>Methods</b>               |        |                                                                                                                                                                                      |                    |
| Study design                 | 4      | Present key elements of study design early in the paper                                                                                                                              | 7                  |
| Setting                      | 5      | Describe the setting, locations, and relevant dates, including periods of recruitment, exposure, follow-up, and data collection                                                      | 7                  |
| Participants                 | 6      | (a) Give the eligibility criteria, and the sources and methods of selection of participants. Describe methods of follow-up                                                           | 9                  |
|                              |        | (b) For matched studies, give matching criteria and number of exposed and unexposed                                                                                                  |                    |
| Variables                    | 7      | Clearly define all outcomes, exposures, predictors, potential confounders, and effect modifiers. Give diagnostic criteria, if applicable                                             | 8                  |
| Data sources/<br>measurement | 8*     | For each variable of interest, give sources of data and details of methods of assessment (measurement). Describe comparability of assessment methods if there is more than one group | 8                  |
| Bias                         | 9      | Describe any efforts to address potential sources of bias                                                                                                                            | 9                  |
| Study size                   | 10     | Explain how the study size was arrived at                                                                                                                                            | 9                  |
| Quantitative variables       | 11     | Explain how quantitative variables were handled in the analyses. If applicable, describe which groupings were chosen and why                                                         | 9                  |
| Statistical methods          | 12     | (a) Describe all statistical methods, including those used to control for confounding                                                                                                | 9                  |
|                              |        | (b) Describe any methods used to examine subgroups and interactions                                                                                                                  | 9                  |
|                              |        | (c) Explain how missing data were addressed                                                                                                                                          | 9                  |
|                              |        | (d) If applicable, explain how loss to follow-up was addressed                                                                                                                       | 9                  |
|                              |        | (e) Describe any sensitivity analyses                                                                                                                                                | 9                  |
| <b>Results</b>               |        |                                                                                                                                                                                      |                    |



|                          |     |                                                                                                                                                                                                              |     |
|--------------------------|-----|--------------------------------------------------------------------------------------------------------------------------------------------------------------------------------------------------------------|-----|
| Participants             | 13* | (a) Report numbers of individuals at each stage of study—eg numbers potentially eligible, examined for eligibility, confirmed eligible, included in the study, completing follow-up, and analysed            | 11  |
|                          |     | (b) Give reasons for non-participation at each stage                                                                                                                                                         | 9   |
|                          |     | (c) Consider use of a flow diagram                                                                                                                                                                           | n/a |
| Descriptive data         | 14* | (a) Give characteristics of study participants (eg demographic, clinical, social) and information on exposures and potential confounders                                                                     | 10  |
|                          |     | (b) Indicate number of participants with missing data for each variable of interest                                                                                                                          | n/a |
|                          |     | (c) Summarise follow-up time (eg, average and total amount)                                                                                                                                                  | 7   |
| Outcome data             | 15* | Report numbers of outcome events or summary measures over time                                                                                                                                               | 9   |
| Main results             | 16  | (a) Give unadjusted estimates and, if applicable, confounder-adjusted estimates and their precision (eg, 95% confidence interval). Make clear which confounders were adjusted for and why they were included | n/a |
|                          |     | (b) Report category boundaries when continuous variables were categorized                                                                                                                                    | n/a |
|                          |     | (c) If relevant, consider translating estimates of relative risk into absolute risk for a meaningful time period                                                                                             | n/a |
| Other analyses           | 17  | Report other analyses done—eg analyses of subgroups and interactions, and sensitivity analyses                                                                                                               | n/a |
| <b>Discussion</b>        |     |                                                                                                                                                                                                              |     |
| Key results              | 18  | Summarise key results with reference to study objectives                                                                                                                                                     | 11  |
| <b>Limitations</b>       |     |                                                                                                                                                                                                              |     |
| Interpretation           | 20  | Give a cautious overall interpretation of results considering objectives, limitations, multiplicity of analyses, results from similar studies, and other relevant evidence                                   | 14  |
| Generalisability         | 21  | Discuss the generalisability (external validity) of the study results                                                                                                                                        | 13  |
| <b>Other information</b> |     |                                                                                                                                                                                                              |     |
| Funding                  | 22  | Give the source of funding and the role of the funders for the present study and, if applicable, for the original study on which the present article is based                                                | 2   |

\*Give information separately for cases and controls in case-control studies and, if applicable, for exposed and unexposed groups in cohort and cross-sectional studies.

**Note:** An Explanation and Elaboration article discusses each checklist item and gives methodological background and published examples of transparent reporting. The STROBE checklist is best used in conjunction with this article (freely available on the Web sites of PLoS Medicine at <http://www.plosmedicine.org/>, Annals of Internal Medicine at <http://www.annals.org/>, and Epidemiology at <http://www.epidem.com/>). Information on the STROBE Initiative is available at [www.strobe-statement.org](http://www.strobe-statement.org).

Walker 1

**Comparison of cognitive decline between dementia with Lewy bodies and Alzheimer's disease: a cohort study**

**Zuzana Walker MD**, Research Department of Mental Health Sciences, University College London, Bloomsbury Campus, London, UK and North Essex Partnership Foundation NHS Trust, Essex, UK

**Ian McKeith FMedSci** Institute for Ageing and Health, Newcastle University, Newcastle upon Tyne, UK

**Joanne Rodda MBChB** Research Department of Mental Health Sciences, University College London, Bloomsbury Campus, London, UK

**Tarik Qassem MBBCh** North Essex Partnership Foundation NHS Trust, Essex, UK and Institute of Psychiatry, Ain Shams University, Cairo, Egypt

**Klaus Tatsch PhD** Department of Nuclear Medicine, Städtisches Klinikum Karlsruhe, Karlsruhe, Germany

**Jan Booi PhD** Department of Nuclear Medicine, Academic Medical Centre, Amsterdam, Netherlands

**Jacques Darcourt PhD** Centre Anoine Lacassagne Department of Nuclear Medicine, Medical Faculty, University of Nice Sophia-Antipolis, Nice, France

**John O'Brien DM**, Institute for Ageing and Health, Newcastle University, Newcastle upon Tyne, UK

**Correspondence:** Zuzana Walker, Mental Health Unit, St. Margaret's Hospital, Epping, Essex, CM16 6TN, UK. email: [z.walker@ucl.ac.uk](mailto:z.walker@ucl.ac.uk)

**Contributions to the manuscript**

Zuzana Walker: Involved in conception and design of the study as well as being a member of the consensus panel; contributed to statistical analysis and interpretation; co-wrote initial draft of the manuscript, prepared final version of the manuscript

Ian McKeith: Involved in conception and design of the study as well as being a member of the consensus panel, contributed to and approved final version of the manuscript

Joanne Rodda: Involved in conception and design of the study, contributed to data analysis and interpretation; co-wrote initial and subsequent drafts of the manuscript, contributed to and approved final version of the manuscript

Tarik Qassem: Involved in conception and design of the study, data processing, analysis and interpretation, contributed to and approved final version of the manuscript

Klaus Tatsch: Involved in conception and design of the study; performed the visual analysis of the SPECT data, contributed to and approved final version of the manuscript

Jan Booij: Involved in conception and design of the study; performed the visual analysis of the SPECT data, contributed to and approved final version of the manuscript

Jacques Darcourt: Involved in conception and design of the study; performed the visual analysis of the SPECT data, contributed to and approved final version of the manuscript

John O'Brien: Involved in conception and design of the study as well as being a member of the consensus panel, contributed to and approved final version of the manuscript

**Study funding and sponsorship:**

The data collection was sponsored by GE Healthcare who made data available for further analysis for the present study.

**Author disclosure statements:**

At the time of the study Zuzana Walker, John O'Brien, Ian McKeith, Klaus Tatsch, Jan Booij and Jacques Darcourt have received consultancy payments from GE Healthcare. Joanne Rodda has received funding for neuroimaging research from GE Healthcare. Tarik Qassem has no disclosures.

## Abstract

**Objectives:** Dementia with Lewy bodies (DLB) accounts for 10-15% of dementia cases at autopsy and has distinct clinical features associated with earlier institutionalisation and a higher level of carer distress than are seen in Alzheimer's disease (AD). At present, there is on-going debate as to whether DLB is associated with a more rapid cognitive decline than AD. An understanding of the rate of decline of cognitive and non-cognitive symptoms in DLB may help patients and carers to plan for the future.

**Design:** In this cohort study we compared 100 AD and 58 DLB subjects at baseline and 12 month follow-up on cognitive and neuropsychiatric measures.

**Setting:** Patients were recruited from 40 European centres.

**Participants:** Subjects with mild-moderate dementia. Diagnosis of DLB or AD required agreement between consensus panel clinical diagnosis and visual rating of 123I-FP-CIT (dopamine transporter) SPECT neuroimaging.

**Outcome measures:** The Cambridge Cognitive Examination including Mini-Mental State Examination and Neuropsychiatric Inventory (NPI).

**Results:** The AD and DLB groups did not differ at baseline in terms of age, gender, Clinical Dementia Rating score and use of cholinesterase inhibitors or memantine. NPI and NPI carer distress scores were statistically significantly higher for DLB subjects at baseline and follow-up and there were no differences between AD and DLB in cognitive scores at baseline or follow-up. There was no significant difference in rate of progression of any of the variables analysed.

**Conclusions:** DLB subjects had more neuropsychiatric features at baseline and follow-up than AD, but we did not find any statistically significant difference in rate of progression between mild-moderate AD and DLB groups on cognitive or neuropsychiatric measures over a 12-month follow-up period.

## Article summary

### Article focus

- Dementia with Lewy bodies (DLB) has distinct neuropsychiatric features
- At present we do not know whether the poorer prognosis of DLB is due to a more rapid cognitive decline compared to Alzheimer's disease (AD)

### Key messages

- In this fairly large cohort of patients with DLB and AD, while there was no difference in level of cognitive impairment (CAMCOG score) at baseline and at 12 months follow-up, DLB patients had significantly higher NPI and NPI carer distress scores both at baseline and 12 months follow-up.
- Therefore the worse prognosis of DLB is likely to be mediated by neuropsychiatric or other symptoms and not only by cognitive decline

### Strengths of this study

- Inclusion of high number of subjects from 40 European clinical centres
- Well characterised cases with both consensus panel clinical diagnosis (three clinical experts) and dopaminergic transporter SPECT imaging

### Limitations of the study

- No autopsy data were available and therefore it is possible that more rapid cognitive decline may be present in pure DLB
- Only one year of follow-up
- There was higher attrition rate (no-follow-up assessment) in the DLB group and DLB patients that did not return for follow-up were more impaired than AD patients

### **Introduction**

Dementia with Lewy bodies (DLB) is the second most common form of neurodegenerative dementia and accounts for approximately 15% of cases of dementia at autopsy<sup>1</sup>. It is characterised by the central feature of a progressive dementia accompanied by one or more core features of fluctuations in cognition, visual hallucinations and spontaneous features of parkinsonism<sup>2</sup>.

Awareness of the rate of cognitive decline and also of non-cognitive symptoms can help carers and patients to adjust and plan appropriate lifestyle changes and to make arrangements for the future. This frequently involves making difficult decisions regarding treatment of psychiatric and motor symptoms and utilisation of limited resources available for patients with dementia.

1  
2  
3  
4  
5  
6  
7  
8 Since its recognition as a neurodegenerative disorder, a body of research has focused on  
9 the differentiation of DLB from other dementias, in particular Alzheimer's disease (AD), in  
10 terms of both cross-sectional and longitudinal clinical factors. In addition to the clinical  
11 syndrome described in the consensus diagnostic criteria, DLB is associated with higher  
12 levels of behavioural disturbance and caregiver distress, lower quality of life and greater  
13 demand on resources when compared to AD<sup>3,4</sup>. Despite these findings, there is uncertainty  
14 within the literature regarding progression and survival in DLB compared to AD. Studies  
15 have shown survival in DLB to be either comparable to<sup>5</sup> or shorter<sup>6</sup> than in AD. No  
16 differences in decline on global measures (e.g. Clinical Dementia Rating, CDR) have been  
17 reported<sup>7</sup>. Studies of the progression of cognitive impairment have generally reported a  
18 similar<sup>7,8</sup> or steeper<sup>5</sup> rate of decline in DLB when compared to AD. An exception to this was  
19 a study by Stavitsky et al. where AD patients had a steeper decline on cognitive and  
20 behavioural measures, although DLB patients had been more impaired at baseline<sup>9</sup>.

21  
22 Comparisons of longitudinal outcomes between DLB and AD to date have generally needed  
23 to trade off diagnostic accuracy against prospective study design. Autopsy studies have the  
24 benefit of definitive diagnosis, but are usually dependent on retrospective analysis of clinical  
25 data. Studies using clinical diagnosis often have the advantage of prospective study design  
26 but at the expense of diagnostic accuracy. Overall, the majority of studies of the 1996 clinical  
27 consensus criteria for DLB<sup>10</sup> have identified high specificity, with lower estimates of  
28 sensitivity. Whilst one study identified 83% sensitivity and 95% specificity, estimates of  
29 sensitivity from other studies have been as low as 23%<sup>11,12</sup> with reports of specificity ranging  
30 from 8-100%; the most frequent misdiagnosis of DLB is as AD<sup>13</sup>.

31  
32 The development of <sup>123</sup>I-FP-CIT SPECT now allows visualisation of striatal dopamine  
33 transporters, and consequentially dopaminergic degeneration *in vivo*, and differentiates  
34 between AD and DLB with a sensitivity and specificity of 78-88% and 94-100% respectively  
35<sup>14</sup>; an abnormal visual rating on <sup>123</sup>I-FP-CIT SPECT was incorporated into the most recent  
36 revision of the consensus diagnostic criteria<sup>2</sup>. In the present study, our aim was to compare  
37 decline in cognitive, behavioural and global measures over a 12-month period in a  
38 prospectively followed cohort of subjects with either AD or DLB confirmed by consensus  
39 panel clinical diagnosis and normal (for AD) and abnormal (for DLB) <sup>123</sup>I-FP-CIT SPECT  
40 imaging.

## 41 42 43 44 45 46 47 48 49 50 51 52 53 **Methods** 54 55 56 57 58 59 60

1  
2  
3  
4  
5  
6  
7  
8 Data were collected as part of a phase 3 multicentre imaging study whose methodology is  
9 described in detail elsewhere <sup>15,16</sup>. In brief, patients were aged 55–90 years and met the  
10 criteria for dementia detailed in DSM-IV and fulfilled at least one of the following: consensus  
11 criteria for DLB <sup>10</sup> or NINCDS-ADRDA criteria for probable or possible AD <sup>17</sup>, or  
12 NINDS/AIREN criteria for probable or possible vascular dementia <sup>18</sup>. A Mini-Mental State  
13 Examination (MMSE) score at baseline of 10 or more was required to ensure patients could  
14 complete assessments <sup>19</sup>. Patients with dementia who developed parkinsonism more than 1  
15 year before the onset of dementia were deemed to have Parkinson's disease with dementia  
16 and were not included <sup>10</sup>. Those with structural imaging findings indicative of infarction in the  
17 region of the basal ganglia, including the internal capsule, were excluded. Use of medication  
18 known or suspected to interact with striatal binding of <sup>123</sup>I-FP-CIT was not permitted <sup>20</sup>.

19  
20  
21  
22  
23  
24 The study was done in accordance with the current revision of the Declaration of Helsinki  
25 and the Good Clinical Practice: Consolidated Guideline approved by the International  
26 Conference on Harmonisation and applicable to national and local laws and regulations. At  
27 every participating site, the study protocol and all amendments were approved by an  
28 institutional review board or independent ethics committee. All patients and caregivers gave  
29 written informed consent.  
30  
31  
32

33  
34 Following inclusion in the initial study, participants were invited for clinical and  
35 neuropsychological re-assessment at 12 months.  
36  
37

38  
39 Clinical diagnosis at baseline, as previously reported, was established by an independent  
40 consensus panel of three specialist clinicians, who were provided with a patient profile  
41 compiled from quality-assured clinical data from the on-site investigators' case record forms  
42 and copies of on-site original source data <sup>15</sup>. The same panel reconvened to consider the  
43 baseline and the 12-month follow-up data to arrive at a second and final consensus  
44 diagnosis. This final consensus diagnosis was used to derive the cohort for the present  
45 study.  
46  
47  
48

49  
50 The following were undertaken at baseline and follow-up: MMSE, Unified Parkinson's  
51 Disease Rating Scale (UPDRS) III (motor section) <sup>21</sup>, modified Hoehn and Yahr staging <sup>22</sup>,  
52 clinical assessment of cognitive fluctuation scale <sup>23</sup>, the Cambridge Cognitive Examination—  
53  
54  
55  
56  
57  
58  
59  
60

revised version (CAMCOG-R)<sup>24</sup>, neuropsychiatric inventory with caregiver input (NPI-D)<sup>25</sup>, visual object and space perception (VOSP) battery<sup>26</sup> and clinical dementia rating (CDR)<sup>27</sup>. The Cornell Scale for Depression in Dementia<sup>28</sup> and the investigator's estimation of the patient's intelligence quotient level were completed at baseline, but not at follow-up. Results of MRI and CT scans and the on-site investigators' clinical diagnosis before imaging were also available. The consensus panel did not at any stage have access to <sup>123</sup>I-FP-CIT SPECT findings and was unaware of the patients' identities, and the names of the centres and the investigators. Before any cases were diagnosed, the consensus panel was asked to diagnose ten patients (separate to the study) for whom autopsy diagnosis was independently available. There was 100% concordance between the diagnoses made by the panel and at autopsy<sup>15</sup>. Individual panel members reviewed each study case, including the baseline consensus panel diagnosis and all subsequent information, before meeting to agree a final clinical diagnosis of probable DLB, possible DLB or non-DLB dementia. Patients in the non-DLB category were further allocated to probable or possible AD, probable or possible vascular dementia or other.

Within a few weeks of the baseline clinical diagnosis, SPECT images were acquired on a 2 or 3 headed gamma camera (SPECT system) 3–6 hours after a single intravenous injection of 111–185 MBq of <sup>123</sup>I-FP-CIT<sup>29</sup> (DaTSCAN<sup>TM</sup>, the radiotracer was supplied by GE Healthcare). See McKeith *et al* for details<sup>15</sup>. Subjects underwent standard thyroid blocking. SPECT imaging was not repeated at follow-up. As previously described, three nuclear medicine physicians assessed scans, blind to diagnosis, using a 4 point scale (0 normal uptake; 1 unilateral putamen loss; 2 bilateral putamen loss; 3 virtually absent uptake)<sup>15</sup>, we used only the dichotomous division of normal (0) versus abnormal (1-3) images for analysis. For the present study, we combined the three independent reads and recorded the result of the scan as normal or abnormal if there was agreement between two or more raters.

For the purposes of the present study, we included only patients with complete data sets from both baseline (T1) and 1 year follow up (T2) assessments and with reliable images from the baseline <sup>123</sup>I-FP-CIT SPECT session (n=225). These patients were divided into two diagnostic groups (AD and DLB). Inclusion criteria for the AD group were a consensus diagnosis of possible or probable AD at 12 months follow-up in addition to a negative (normal) <sup>123</sup>I-FP-CIT SPECT read (n=100). To be included in the DLB group, patients were required to have a consensus diagnosis of probable DLB at 12 months follow up and to have a positive (abnormal) <sup>123</sup>I-FP-CIT SPECT image read (n=58). Patients with a dementia



diagnosis other than possible or probable AD or probable DLB were excluded (n=50); see flowchart, Figure.

Figure: Flowchart of subjects included in the study

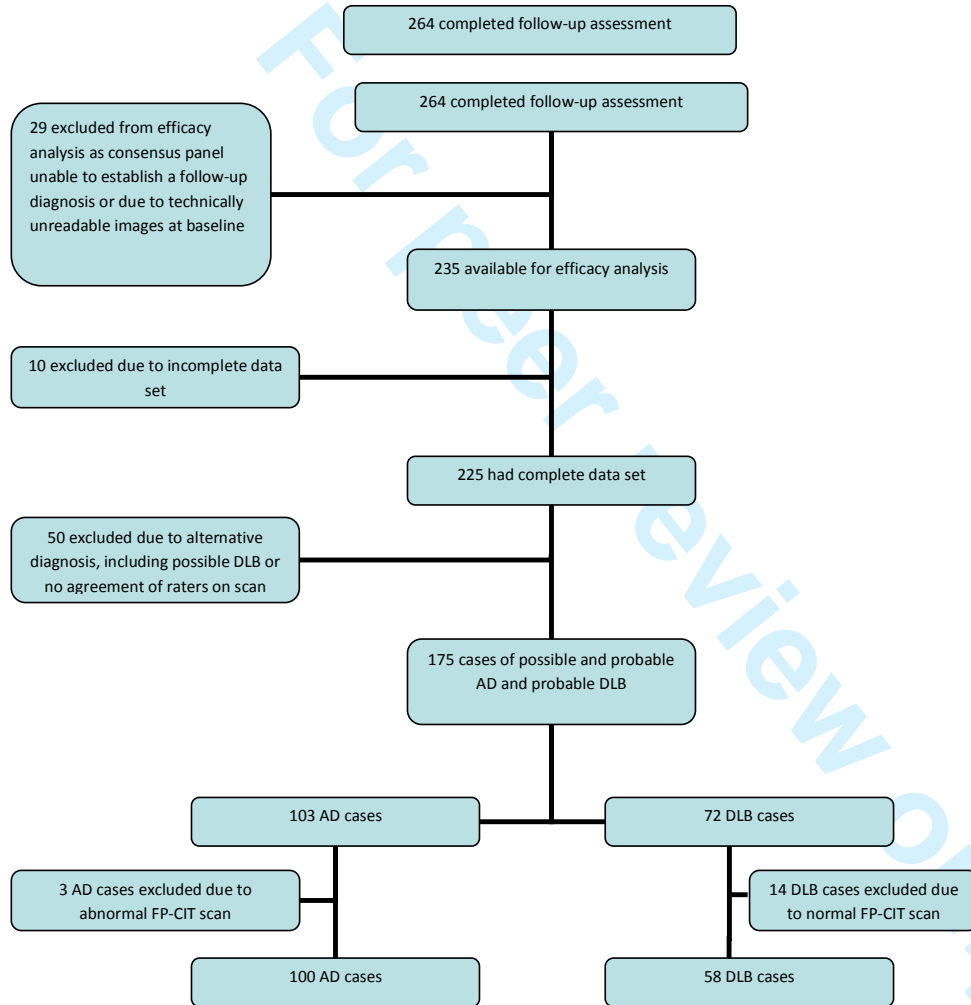

N.B. The flowchart details patients who completed both baseline and follow-up assessments. 25 patients with a diagnosis of DLB at baseline, and 19 patients with a diagnosis of AD at baseline did not return for follow-up and are therefore not included in the flowchart.

### Statistical analysis

Data were analysed using SPSS version 18. We compared baseline and 12-month follow-up data and change over time for the AD and DLB groups.  $\chi^2$  tests were used to assess differences between the diagnostic groups (AD and DLB) with respect to gender and medication use at baseline. For normally distributed variables, t-tests were used for between-group comparisons of baseline and follow-up variables. Mann Whitney U-tests were used for non-normally distributed baseline and follow-up data. Repeated measures ANOVA was used for analysis of group x time interactions (comparison of change in variables over time in each group). General Linear Models with fixed effect were used to adjust for the difference in NPI scores and the scores on the Cornell Scale for Depression in Dementia at baseline

## Results

|                                                       |           | AD<br>(n=100) | DLB<br>(n=58) | P      |
|-------------------------------------------------------|-----------|---------------|---------------|--------|
| Gender (M:F)                                          | M         | 48 [48%]      | 37 [64%]      | 0.06   |
|                                                       | F         | 52 [52%]      | 21 [36%]      |        |
| Age in years at <sup>123</sup> I-FP-CIT SPECT session |           | 74.9 (7.3)    | 74.2 (6.1)    | 0.53   |
| Cornell Scale for Depression in Dementia (baseline)   |           | 3.8 (3.3)     | 6.6 (3.4)     | <0.001 |
| Cholinesterase inhibitor                              |           | 82 [82%]      | 45 [76%]      | 0.50   |
| Memantine                                             |           | 9 [9%]        | 2 [3%]        | 0.19   |
| Neuroleptic medication                                |           | 4 [4%]        | 9 [16%]       | 0.01   |
| Clinical Dementia Rating (baseline)                   |           | 1.2 (0.69)    | 1.3 (0.66)    | 0.3    |
| MMSE score (SD)                                       | Baseline  | 21.5 (4.5)    | 21.4 (3.9)    | 0.85   |
|                                                       | Follow-up | 19.0 (6.2)    | 18.5 (6.0)    | 0.65   |
|                                                       | Change    | 2.6 (4.0)     | 3.1 (4.3)     | 0.40   |
| CAMCOG score (SD)                                     | Baseline  | 66.3 (15.6)   | 66.0 (13.5)   | 0.89   |
|                                                       | Follow-up | 59.5 (20.3)   | 56.3 (19.7)   | 0.35   |
|                                                       | Change    | 7.5 (10.6)    | 9.0 (11.9)    | 0.429  |
| NPI score (SD)                                        | Baseline  | 9.7 (10.3)    | 19.8 (14.6)   | <0.001 |
|                                                       | Follow-up | 12.3 (13.3)   | 24.2 (17.4)   | <0.001 |
|                                                       | Change    | 2.5 (14.8)    | 3.8 (15.5)    | 0.59   |
| NPI-carer score (SD)                                  | Baseline  | 5.8 (6.0)     | 10.8 (8.0)    | <0.001 |
|                                                       | Follow-up | 5.8 (5.7)     | 11.8 (8.6)    | <0.001 |
|                                                       | Change    | -0.05 (6.4)   | 0.8 (7.1)     | 0.44   |
| Fluctuations                                          | Baseline  | 0.6 (2.1)     | 6.0 (4.5)     | <0.001 |
|                                                       | Follow up | 0.4 (1.7)     | 6.9 (4.1)     | <0.001 |
|                                                       | Change    | -0.2 (2.4)    | 0.8 (4.1)     | 0.07   |
| CAMCOG Executive function                             | Baseline  | 11.9 (5.2)    | 11.1 (4.7)    | 0.33   |
|                                                       | Follow-up | 10.5 (5.4)    | 9.4 (5.0)     | 0.24   |
|                                                       | Change    | 1.5 (3.6)     | 1.4 (4.0)     | 0.83   |

Table: Baseline characteristics and scores on clinical scales and cognitive testing at baseline and 12 month follow-up and change in scores between time points for AD and DLB groups.

Data are presented as mean (SD) or number (%). P= P-values (ANOVA).

Baseline and follow-up data for the DLB and AD groups are presented in the table. The groups did not differ in terms of age or gender. There were no between-group baseline differences in terms of CDR or use of cholinesterase inhibitors or memantine. The DLB

group had a statistically significant higher mean depression score at baseline and higher scores on the NPI, NPI carer distress and clinical assessment of cognitive fluctuation scales at both baseline and 12-month follow-up ( $p < 0.001$ ). There were no differences between the groups on cognitive scores at either baseline or follow-up. No significant differences in change in scores between baseline and 12-month follow-up for any of the variables analysed were identified. Results of analysis did not change when data were stratified according to gender. There was also no statistically significant difference between DLB and AD in the change of CAMCOG score after adjustment for scores on NPI and Cornell Scale for Depression scores. There were numerically greater changes (more decline) between baseline and follow-up on cognition, fluctuation and on measures of neuropsychiatric symptoms in the DLB patients but this did not reach statistical significance. The lack of a significant difference on the cognitive performance between the DLB and AD groups is unlikely to be due to lack of power, therefore type II error, as the effect size of that difference was very small (0.02-0.07) and only a sample size of 1685 subjects would have shown a significant difference.

A higher number of DLB patients (25) compared to AD patients (19) did not return for a follow-up visit. DLB patients lost to follow-up were significantly more cognitively impaired than AD patients lost to follow-up at baseline on MMSE (score 17.3 vs 22.2), CAMCOG (score 53.1 vs 66.7) and executive function (score 8.4 vs 13.3). Since these patients lost to follow-up were not given a final diagnosis, they were not included in the main analysis.

## Discussion

In a prospectively-followed sample of patients with clinical consensus panel and dopamine transporter SPECT confirmed diagnosis of AD or DLB, cross-sectional assessments identified expected between-group similarities and differences in cognitive scores and clinical scales in addition to a higher level of carer distress relating to the symptoms of DLB patients. We identified no differences in rate of progression of cognitive or neuropsychiatric variables over a 12-month follow-up period. Our inclusion of only patients whose consensus clinical diagnosis was in keeping with neuroimaging results make it likely that diagnostic accuracy was very high.

AD and DLB groups were well-matched in terms of age and degree of cognitive impairment at baseline. The findings of higher scores on the NPI, clinician assessment of fluctuation and Cornell Scale for Depression in dementia were expected given the recognised criteria for diagnosis of DLB<sup>2</sup>.

1  
2  
3  
4  
5  
6  
7  
8  
9  
10  
11  
12  
13  
14  
15  
16  
17  
18  
19  
20  
21  
22  
23  
24  
25  
26  
27  
28  
29  
30  
31  
32  
33  
34  
35  
36  
37  
38  
39  
40  
41  
42  
43  
44  
45  
46  
47  
48  
49  
50  
51  
52  
53  
54  
55  
56  
57  
58  
59  
60

NPI score was higher at both time points in DLB, despite similar cognitive and baseline CDR scores; this was associated with higher levels of caregiver distress and is in keeping with other published data<sup>4,30</sup>. Severity of neuropsychiatric symptoms in AD<sup>31</sup> and DLB<sup>32</sup> has been shown to be a predictor of both caregiver distress and nursing home placement. Caregiver distress has also been shown to be an independent risk factor for nursing home placement in dementia<sup>33</sup>. It is possible that the shorter time to nursing home placement that has been reported in DLB compared to AD<sup>34</sup> is related to neuropsychiatric symptoms and associated caregiver distress. Not all studies are consistent, however, and marginal<sup>6</sup> or no differences<sup>8</sup> in time to placement have also been reported. Furthermore, costs of care in DLB and AD have been shown to correlate with impairments in activities of daily living and not NPI scores<sup>4</sup>.

Severity of neuropsychiatric symptomatology, and hallucinations in particular, has also been associated with steeper decline in cognitive scores and increased risk of mortality and institutionalisation in AD, independent of antipsychotic drug use<sup>35,36</sup>. These studies have lacked autopsy confirmation of diagnosis and it is possible that AD groups included individuals with undiagnosed DLB, who are more likely to experience hallucinations. We are not aware of any published data related to the impact of neuropsychiatric symptom severity on illness progression and survival in DLB.

We did not identify any between-group differences in change over time of any of the variables examined, i.e. NPI, fluctuations and cognitive performance. It is possible that the lack of detectable difference in decline of NPI and fluctuation scores over time is related to the already high scores at baseline in DLB. The majority of studies of the rate of cognitive decline in DLB vs AD have also reported no differences, e.g.<sup>7,8</sup>, although the earliest reports were of more rapid decline in cognition in DLB<sup>37</sup>, as were more recent studies<sup>5</sup>. Several studies have reported relatively preserved cognitive scores, particularly in recall, before death in DLB compared to AD<sup>5</sup>. [As mentioned in 'Results', patients diagnosed as DLB at baseline who were lost to follow-up were significantly more cognitively impaired than patients diagnosed as AD at baseline who were lost to follow-up. These patients were not included in the final analysis, as the cohort analysed was derived from the final consensus diagnosis made at follow-up. Thus, although patients lost to follow-up appeared to differ cognitively depending on diagnosis, and this could have affected the study's results, their diagnoses](#)

Deleted: ¶

[was not made at the same time point as for the patients included in the final cohort.](#)  
[Reviewing the characteristics of patients lost to follow up must therefore be done tentatively,](#)  
[as their diagnoses were subject to change.](#)

It has been suggested that DLB may be associated with a more rapid decline in global measures of dementia severity or measures of activities of daily living whilst cognitive performance is relatively preserved. However, no significant differences in change in CDR score over time between DLB and AD groups have yet been identified<sup>7</sup>. We did not examine performance on activities of daily living. Cross-sectional assessments of activities of living have reported higher levels of impairment in DLB than AD<sup>9;30</sup>, which may be related to extrapyramidal motor symptoms<sup>38</sup>. Longitudinal data, however, suggest no difference or a marginal difference in rate of decline of activities of daily living between AD and DLB<sup>9</sup>.

Whilst ours and the majority of studies do not support the idea of a more rapid decline in cognition in DLB, the available literature is split more evenly between findings of either similar or shorter survival in DLB compared to AD. One possibility is that reports of worse outcomes in DLB are related to increased frequency of antipsychotic use as a result of greater severity of neuropsychiatric symptoms. Whilst more DLB than AD participants were prescribed neuroleptics in the present study, no differences in rate of progression were identified. Previous studies of cognitive decline in AD and DLB that have presented data on neuroleptic prescribing did not report any differences between the groups in use of these medications<sup>8;39</sup>. In terms of survival, both early<sup>40</sup> and more recent<sup>6;8</sup> studies have reported shorter survival in DLB vs AD, despite likely changes in neuroleptic prescribing over this time as a result of better understanding of the potentially harmful effects in both DLB<sup>2;10</sup> and dementia as a whole. It therefore seems unlikely that reported differences in survival between DLB and AD can be entirely accounted for by antipsychotic use.

The literature surrounding the differences in longitudinal outcomes in DLB and AD is therefore not easy to interpret. Overall, studies report outcomes in DLB that are either no different from or worse than in AD. Some of the difficulties involved in interpreting and comparing these findings are the differences in study design, use of clinical rather than pathological diagnosis, differing pathological definitions, and retrospective analysis of clinical data. In addition, studies often rely on relative's reports on the onset of dementia, or use as baseline the time of referral, diagnosis or entry into the study. None of these methods

necessarily identify equivalent disease stages and these difficulties highlight the complexity of the task of comparing the rate of decline between two disorders with different clinical phenotypes. In DLB, episodic memory is relatively spared in the early stages, but the presence of attentional and visuospatial impairments, visual hallucinations or movement disorder might be more disabling. Comparisons between AD and DLB are therefore not straightforward, and it is hard to define what is an “equivalent” disease stage. The picture is further complicated by the frequent overlap of AD and DLB neuropathology and the insidious onset of both of these conditions.

Our study would have been improved by a longer duration of follow-up and a more detailed breakdown of cognitive, behavioural and clinical measures. [Furthermore, patients' ability to carry out Activities of daily living \(ADLs\) was not measured, and this can be a useful marker of disease severity and progression.](#) Exclusion of individuals with severe dementia and higher attrition (not returning for follow-up visit) of DLB cases with more severe cognitive impairment precluded detection of differences in progression that are present only in later disease stages. Larger cohorts of patients which could be stratified by stages of severity of dementia are needed to examine this possibility. DLB group had a higher mean depression score at baseline and more patients took a neuroleptic. Both neuroleptics and antidepressants have been shown to have detrimental effect on patients with dementia and could lead to faster progression but this did not seem to be the case over the duration of one year. Without autopsy diagnosis, we were not able to differentiate patients with pure and combined pathology.

In conclusion, on global cognitive measures, we did not find any difference in rate of progression between mild-moderate AD and DLB groups over a one-year period of observation. Cognitive decline is only one aspect of dementia and other impairments may in fact be more important and disabling.

## Reference List

1. Holmes C, Cairns N, Lantos P et al. Validity of current clinical criteria for Alzheimer's disease, vascular dementia and dementia with Lewy bodies. *Br.J.Psychiatry* 1999;**174**:45-50.
2. McKeith IG, Dickson DW, Lowe J et al. Diagnosis and management of dementia with Lewy bodies: third report of the DLB Consortium. *Neurology* 2005;**65**:1863-72.
3. Bostrom F, Jonsson L, Minthon L et al. Patients with dementia with lewy bodies have more impaired quality of life than patients with Alzheimer disease. *Alzheimer Dis.Assoc.Disord.* 2007;**21**:150-4.
4. Bostrom F, Jonsson L, Minthon L et al. Patients with Lewy body dementia use more resources than those with Alzheimer's disease. *Int.J.Geriatr.Psychiatry* 2007;**22**:713-9.
5. Nelson PT, Kryscio RJ, Jicha GA et al. Relative preservation of MMSE scores in autopsy-proven dementia with Lewy bodies. *Neurology* 2009;**73**:1127-33.
6. Williams MM, Xiong C, Morris JC et al. Survival and mortality differences between dementia with Lewy bodies vs Alzheimer disease. *Neurology* 2006;**67**:1935-41.
7. Johnson DK, Morris JC, Galvin JE. Verbal and visuospatial deficits in dementia with Lewy bodies. *Neurology* 2005;**65**:1232-8.
8. Hanyu H, Sato T, Hirao K et al. Differences in clinical course between dementia with Lewy bodies and Alzheimer's disease. *Eur.J.Neurol.* 2009;**16**:212-7.
9. Stavitsky K, Brickman AM, Scarmeas N et al. The progression of cognition, psychiatric symptoms, and functional abilities in dementia with Lewy bodies and Alzheimer disease. *Arch.Neurol.* 2006;**63**:1450-6.
10. McKeith IG, Galasko D, Kosaka K et al. Consensus guidelines for the clinical and pathologic diagnosis of dementia with Lewy bodies (DLB): report of the consortium on DLB international workshop. *Neurology* 1996;**47**:1113-24.
11. Lopez OL, Becker JT, Kaufer DI et al. Research evaluation and prospective diagnosis of dementia with Lewy bodies. *Arch.Neurol* 2002;**59**:43-6.



12. O'Brien JT, Colloby S, Fenwick J et al. Dopamine transporter loss visualized with FP-CIT SPECT in the differential diagnosis of dementia with Lewy bodies. *Arch.Neurol.* 2004;**61**:919-25.
13. Barker WW, Luis CA, Kashuba A et al. Relative frequencies of Alzheimer disease, Lewy body, vascular and frontotemporal dementia, and hippocampal sclerosis in the State of Florida Brain Bank. *Alzheimer Dis.Assoc.Disord.* 2002;**16**:203-12.
14. Walker Z, Jaros E, Walker RW et al. Dementia with lewy bodies: A comparison of clinical diagnosis, FP-CIT SPECT imaging and autopsy. *J.Neurol.Neurosurg.Psychiatry* 2007.
15. McKeith I, O'Brien JT, Walker Z et al. Sensitivity and specificity of dopamine transporter imaging with 123I-FP-CIT SPECT in dementia with Lewy bodies: a phase III, multicentre study. *Lancet Neurol.* 2007;**6**:305-13.
16. O'Brien JT, McKeith IG, Walker Z et al. Diagnostic accuracy of 123I-FP-CIT SPECT in possible dementia with Lewy bodies. *Br.J.Psychiatry* 2009;**194**:34-9.
17. McKhann G, Drachman D, Folstein M et al. Clinical diagnosis of Alzheimer's disease: report of the NINCDS-ADRDA Work Group under the auspices of Department of Health and Human Services Task Force on Alzheimer's Disease. *Neurology* 1984;**34**:939-44.
18. Roman GC, Tatemichi TK, Erkinjuntti T et al. Vascular dementia: diagnostic criteria for research studies. Report of the NINDS-AIREN International Workshop. *Neurology* 1993;**43**:250-60.
19. Folstein MF, Folstein SE, McHugh PR. "Mini-mental state". A practical method for grading the cognitive state of patients for the clinician. *J.Psychiatr.Res.* 1975;**12**:189-98.
20. Booij J, Kemp P. Dopamine transporter imaging with [(123)I]FP-CIT SPECT: potential effects of drugs. *Eur.J.Nucl.Med.Mol.Imaging* 2008;**35**:424-38.
21. Fahn S, Elton RL. Unified Parkinson's Disease Rating Scale. In: Fahn S, Marsden DC, Goldstein M, Calne DB, eds. *Recent Developments in Parkinson's Disease.* McMillan 1987.

22. Hoehn MM, Yahr MD. Parkinsonism: onset, progression, and mortality. 1967. *Neurology* 1998;**50**:318.
23. Walker MP, Ayre GA, Cummings JL et al. The Clinician Assessment of Fluctuation and the One Day Fluctuation Assessment Scale. Two methods to assess fluctuating confusion in dementia. *Br.J.Psychiatry* 2000;**177**:252-6.
24. Huppert FA, Brayne C, Gill C et al. CAMCOG--a concise neuropsychological test to assist dementia diagnosis: socio-demographic determinants in an elderly population sample. *Br.J.Clin.Psychol.* 1995;**34 ( Pt 4)**:529-41.
25. Cummings JL, Mega M, Gray K et al. The Neuropsychiatric Inventory: comprehensive assessment of psychopathology in dementia. *Neurology* 1994;**44**:2308-14.
26. Warrington EK, James M. A new test of object decision: 2D silhouettes featuring a minimal view. *Cortex* 1991;**27**:370-83.
27. Hughes CP, Berg L, Danziger WL et al. A new clinical scale for the staging of dementia. *Br.J.Psychiatry* 1982;**140**:566-72.
28. Alexopoulos GS, Abrams RC, Young RC et al. Cornell Scale for Depression in Dementia. *Biol.Psychiatry* 1988;**23**:271-84.
29. Booij J, Hemelaar TG, Speelman JD et al. One-day protocol for imaging of the nigrostriatal dopaminergic pathway in Parkinson's disease by [<sup>123</sup>I]FPCIT SPECT. *J.Nucl.Med.* 1999;**40**:753-61.
30. Ricci M, Guidoni SV, Sepe-Monti M et al. Clinical findings, functional abilities and caregiver distress in the early stage of dementia with Lewy bodies (DLB) and Alzheimer's disease (AD). *Arch.Gerontol.Geriatr.* 2009;**49**:e101-e104.
31. Rocca P, Leotta D, Liffredo C et al. Neuropsychiatric Symptoms Underlying Caregiver Stress and Insight in Alzheimer's Disease. *Dement.Geriatr.Cogn Disord.* 2010;**30**:57-63.
32. Leggett AN, Zarit S, Taylor A et al. Stress and Burden Among Caregivers of Patients with Lewy Body Dementia. *Gerontologist* 2010.
33. Gaugler JE, Yu F, Krichbaum K et al. Predictors of nursing home admission for persons with dementia. *Med.Care* 2009;**47**:191-8.

- 1  
2  
3  
4  
5  
6  
7  
8 34. Rongve, A, Skogseth, R, and Aarsland, D. Risk of nursing home placement in  
9 dementia with Lewy bodies and Alzheimer's dementia. *Alzheimer's and Dementia* 5(4  
10 Supplement), 79. 2010.  
11 Ref Type: Abstract  
12  
13  
14 35. Wilson RS, Tang Y, Aggarwal NT et al. Hallucinations, cognitive decline, and death in  
15 Alzheimer's disease. *Neuroepidemiology* 2006;**26**:68-75.  
16  
17 36. Scarmeas N, Brandt J, Albert M et al. Delusions and hallucinations are associated with  
18 worse outcome in Alzheimer disease. *Arch.Neurol.* 2005;**62**:1601-8.  
19  
20 37. Olichney JM, Galasko D, Salmon DP et al. Cognitive decline is faster in Lewy body  
21 variant than in Alzheimer's disease. *Neurology* 1998;**51**:351-7.  
22  
23 38. McKeith IG, Rowan E, Askew K et al. More severe functional impairment in dementia  
24 with lewy bodies than Alzheimer disease is related to extrapyramidal motor  
25 dysfunction. *Am.J.Geriatr.Psychiatry* 2006;**14**:582-8.  
26  
27 39. Weiner MF, Risser RC, Cullum CM et al. Alzheimer's disease and its Lewy body  
28 variant: a clinical analysis of postmortem verified cases. *Am.J.Psychiatry*  
29 1996;**153**:1269-73.  
30  
31 40. Ballard C, Holmes C, McKeith I et al. Psychiatric morbidity in dementia with Lewy  
32 bodies: a prospective clinical and neuropathological comparative study with  
33 Alzheimer's disease. *Am.J.Psychiatry* 1999;**156**:1039-45.  
34  
35  
36  
37  
38  
39  
40  
41  
42  
43  
44  
45  
46  
47  
48  
49  
50  
51  
52  
53  
54  
55  
56  
57  
58  
59  
60
